# Supplementary material for: Resonance Raman spectra of β-carotene in solution and in photosystems revisited: an experimental and theoretical study
Source: Royal Society of Chemistry journal article supplement (doi:10.1039/b917341b), 2009-01-01
Supplement: b917341b.pdf [file b917341b.pdf]

## Supporting information

### Resonance Raman spectra of $\beta$ -carotene in solution and in photosystems revisited: An experimental and theoretical study

Norman Tschirner<sup>1</sup>, Matthias Schenderlein<sup>2</sup>, Katharina Brose<sup>1</sup>, Eberhard Schlodder<sup>2</sup>, Maria Andrea Mroginski<sup>2</sup>, Christian Thomsen<sup>1</sup>, Peter Hildebrandt<sup>2\*</sup>

<sup>1</sup> Technische Universität Berlin, Institut für Festkörperphysik, Hardenbergstrasse 26, D-10623 Berlin, Germany

<sup>2</sup> Technische Universität Berlin, Institut für Chemie, Sekr. PC14, Straße des 17. Juni 135, D-10623 Berlin

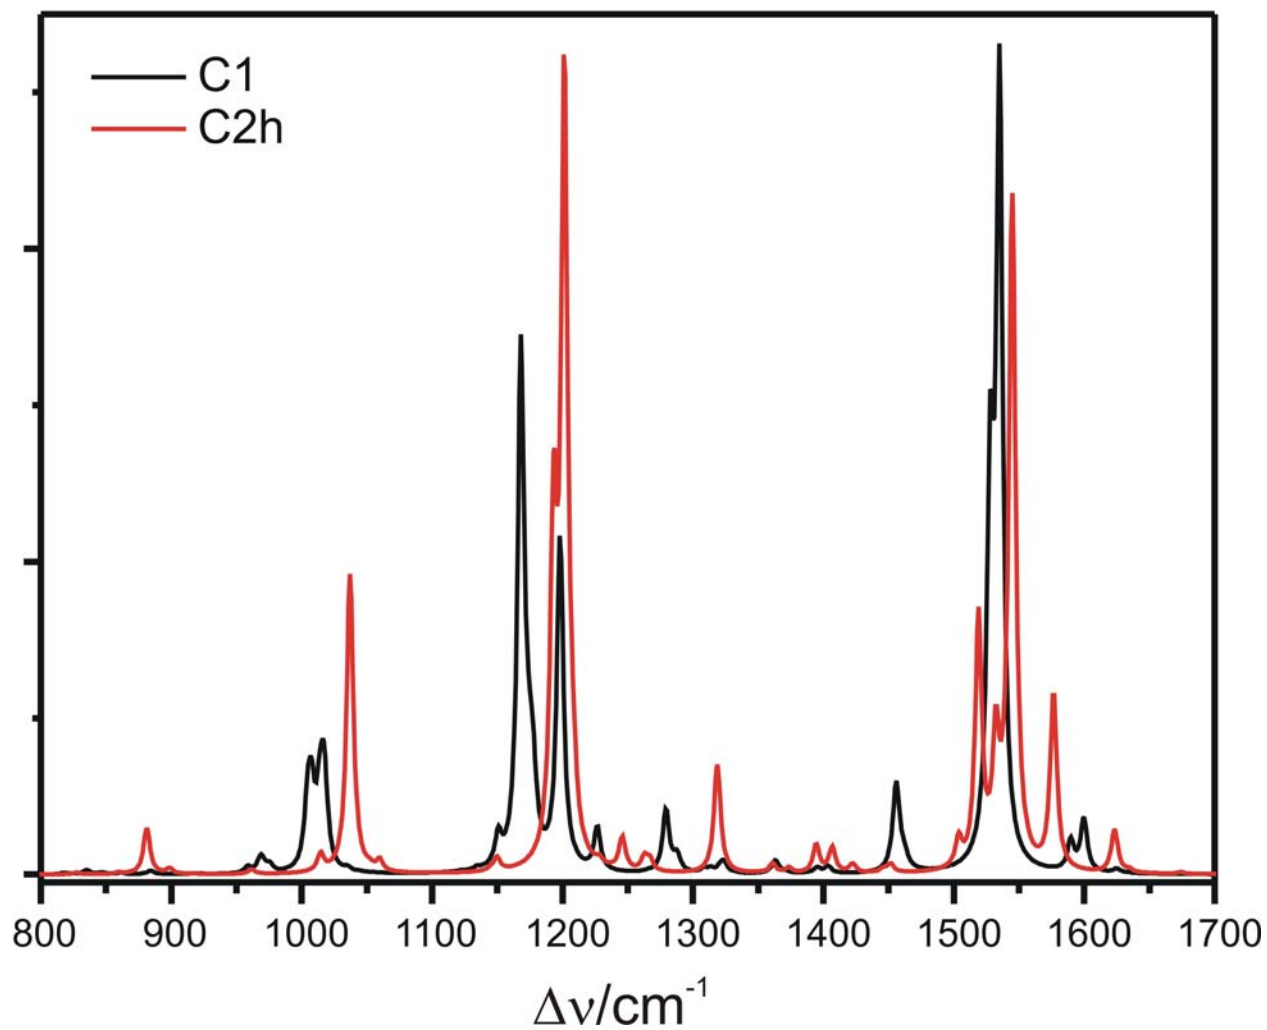

**Fig. S1.** Raman spectra of  $\beta$ -carotene calculated for the unconstrained and the  $C_{2h}$ -constrained structure.

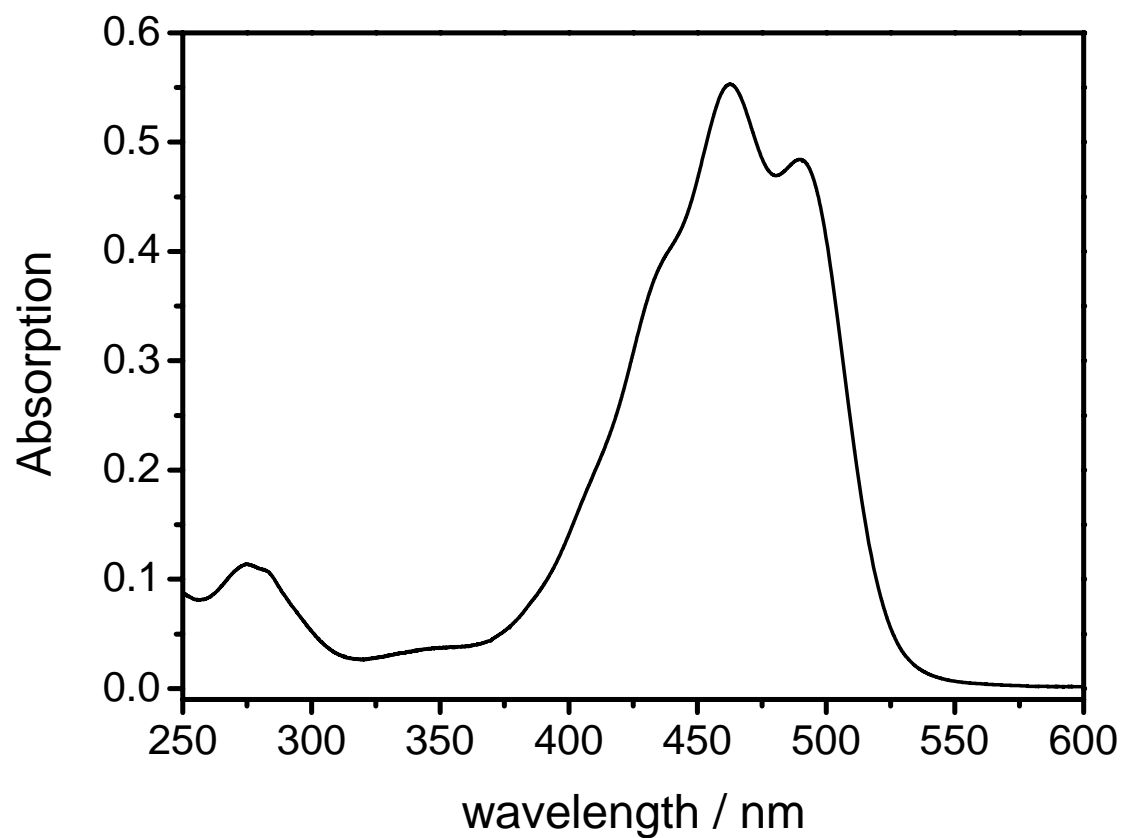

**Fig. S2.** Absorption spectrum of  $\beta$ -carotene in dichloromethane solution.

**Table S1.** Calculated normal modes, Raman ( $I_{\text{Ra}}$ ) and IR intensities ( $I_{\text{IR}}$ ) of  $\beta$ -carotene in its fully relaxed geometry. For numbering of the atoms, see Fig. 1.

| mode No. | $\nu$ [ $\text{cm}^{-1}$ ] | $I_{\text{IR}}$ [ $\text{km/mol}$ ] | $I_{\text{Ra}}$ (rel.) | potential energy distribution |       |       |              |
|----------|----------------------------|-------------------------------------|------------------------|-------------------------------|-------|-------|--------------|
| 1        | 3058.46                    | 35.20                               | 0.00                   | ( 95.74%)                     | ( 52) | C - H | STRE (24,76) |
| 2        | 3057.51                    | 33.78                               | 0.00                   | ( 95.74%)                     | ( 20) | C - H | STRE (11,57) |
| 3        | 3041.71                    | 33.65                               | 0.00                   | ( 6.28%)                      | ( 57) | C - H | STRE (27,78) |
|          |                            |                                     |                        | ( 91.88%)                     | ( 59) | C - H | STRE (28,79) |
| 4        | 3039.74                    | 103.47                              | 0.00                   | ( 41.79%)                     | ( 43) | C - H | STRE (19,72) |
|          |                            |                                     |                        | ( 43.69%)                     | ( 45) | C - H | STRE (20,73) |
|          |                            |                                     |                        | ( 5.03%)                      | ( 75) | C - H | STRE (35,83) |
|          |                            |                                     |                        | ( 5.70%)                      | ( 80) | C - H | STRE (36,87) |
| 5        | 3032.69                    | 0.02                                | 0.00                   | ( 40.50%)                     | ( 43) | C - H | STRE (19,72) |
|          |                            |                                     |                        | ( 37.71%)                     | ( 45) | C - H | STRE (20,73) |
|          |                            |                                     |                        | ( 9.81%)                      | ( 75) | C - H | STRE (35,83) |
|          |                            |                                     |                        | ( 10.13%)                     | ( 80) | C - H | STRE (36,87) |
| 6        | 3031.28                    | 37.80                               | 0.00                   | ( 12.77%)                     | ( 13) | C - H | STRE ( 7,54) |
|          |                            |                                     |                        | ( 80.55%)                     | ( 15) | C - H | STRE ( 8,55) |
| 7        | 3026.29                    | 19.74                               | 0.00                   | ( 86.88%)                     | ( 57) | C - H | STRE (27,78) |
|          |                            |                                     |                        | ( 5.98%)                      | ( 59) | C - H | STRE (28,79) |
| 8        | 3021.09                    | 15.60                               | 0.00                   | ( 63.05%)                     | ( 13) | C - H | STRE ( 7,54) |
|          |                            |                                     |                        | ( 22.80%)                     | ( 23) | C - H | STRE (12,59) |
|          |                            |                                     |                        | ( 5.43%)                      | ( 34) | C - H | STRE (15,67) |
| 9        | 3017.82                    | 30.27                               | 0.00                   | ( 9.12%)                      | ( 13) | C - H | STRE ( 7,54) |
|          |                            |                                     |                        | ( 10.83%)                     | ( 15) | C - H | STRE ( 8,55) |
|          |                            |                                     |                        | ( 61.77%)                     | ( 23) | C - H | STRE (12,59) |
|          |                            |                                     |                        | ( 9.93%)                      | ( 34) | C - H | STRE (15,67) |
| 10       | 3017.64                    | 3.41                                | 0.00                   | ( 6.06%)                      | ( 45) | C - H | STRE (20,73) |
|          |                            |                                     |                        | ( 22.70%)                     | ( 75) | C - H | STRE (35,83) |
|          |                            |                                     |                        | ( 42.56%)                     | ( 80) | C - H | STRE (36,87) |
|          |                            |                                     |                        | ( 13.47%)                     | ( 84) | C - H | STRE (37,90) |
| 11       | 3017.41                    | 6.01                                | 0.00                   | ( 26.86%)                     | ( 84) | C - H | STRE (37,90) |
|          |                            |                                     |                        | ( 52.21%)                     | ( 86) | C - H | STRE (38,42) |
| 12       | 3017.30                    | 28.81                               | 0.00                   | ( 47.37%)                     | ( 84) | C - H | STRE (37,90) |
|          |                            |                                     |                        | ( 35.27%)                     | ( 86) | C - H | STRE (38,42) |
| 13       | 3016.65                    | 5.55                                | 0.00                   | ( 7.29%)                      | ( 13) | C - H | STRE ( 7,54) |
|          |                            |                                     |                        | ( 39.64%)                     | ( 34) | C - H | STRE (15,67) |
|          |                            |                                     |                        | ( 17.35%)                     | ( 75) | C - H | STRE (35,83) |
|          |                            |                                     |                        | ( 14.36%)                     | ( 80) | C - H | STRE (36,87) |
| 14       | 3016.48                    | 2.64                                | 0.00                   | ( 5.10%)                      | ( 13) | C - H | STRE ( 7,54) |
|          |                            |                                     |                        | ( 33.33%)                     | ( 34) | C - H | STRE (15,67) |
|          |                            |                                     |                        | ( 7.00%)                      | ( 43) | C - H | STRE (19,72) |
|          |                            |                                     |                        | ( 27.83%)                     | ( 75) | C - H | STRE (35,83) |
|          |                            |                                     |                        | ( 11.89%)                     | ( 80) | C - H | STRE (36,87) |
| 15       | 3010.33                    | 0.74                                | 0.00                   | ( 26.78%)                     | ( 38) | C - H | STRE (16,70) |

|    |         |        |      |           |       |   |   |   |      |         |
|----|---------|--------|------|-----------|-------|---|---|---|------|---------|
|    |         |        |      | ( 11.88%) | ( 41) | C | - | H | STRE | (18,71) |
|    |         |        |      | ( 15.21%) | ( 47) | C | - | H | STRE | (21,74) |
|    |         |        |      | ( 37.02%) | ( 50) | C | - | H | STRE | (23,75) |
| 16 | 3009.32 | 126.38 | 0.00 | ( 41.52%) | ( 38) | C | - | H | STRE | (16,70) |
|    |         |        |      | ( 9.15%)  | ( 41) | C | - | H | STRE | (18,71) |
|    |         |        |      | ( 5.95%)  | ( 47) | C | - | H | STRE | (21,74) |
|    |         |        |      | ( 30.85%) | ( 50) | C | - | H | STRE | (23,75) |
| 17 | 3003.49 | 0.18   | 0.00 | ( 12.56%) | ( 18) | C | - | H | STRE | (10,56) |
|    |         |        |      | ( 15.04%) | ( 41) | C | - | H | STRE | (18,71) |
|    |         |        |      | ( 30.23%) | ( 47) | C | - | H | STRE | (21,74) |
|    |         |        |      | ( 36.04%) | ( 54) | C | - | H | STRE | (25,77) |
| 18 | 3002.72 | 5.57   | 0.00 | ( 42.54%) | ( 18) | C | - | H | STRE | (10,56) |
|    |         |        |      | ( 23.06%) | ( 41) | C | - | H | STRE | (18,71) |
|    |         |        |      | ( 5.61%)  | ( 47) | C | - | H | STRE | (21,74) |
|    |         |        |      | ( 24.53%) | ( 54) | C | - | H | STRE | (25,77) |
| 19 | 3001.30 | 0.36   | 0.00 | ( 18.48%) | ( 18) | C | - | H | STRE | (10,56) |
|    |         |        |      | ( 9.87%)  | ( 38) | C | - | H | STRE | (16,70) |
|    |         |        |      | ( 5.25%)  | ( 41) | C | - | H | STRE | (18,71) |
|    |         |        |      | ( 21.33%) | ( 47) | C | - | H | STRE | (21,74) |
|    |         |        |      | ( 20.52%) | ( 50) | C | - | H | STRE | (23,75) |
|    |         |        |      | ( 23.42%) | ( 54) | C | - | H | STRE | (25,77) |
| 20 | 3000.60 | 16.64  | 0.00 | ( 16.04%) | ( 18) | C | - | H | STRE | (10,56) |
|    |         |        |      | ( 18.25%) | ( 38) | C | - | H | STRE | (16,70) |
|    |         |        |      | ( 32.08%) | ( 41) | C | - | H | STRE | (18,71) |
|    |         |        |      | ( 18.10%) | ( 47) | C | - | H | STRE | (21,74) |
|    |         |        |      | ( 7.89%)  | ( 50) | C | - | H | STRE | (23,75) |
|    |         |        |      | ( 5.03%)  | ( 54) | C | - | H | STRE | (25,77) |
| 21 | 2988.44 | 43.91  | 0.00 | ( 7.44%)  | ( 26) | C | - | H | STRE | (13,61) |
|    |         |        |      | ( 63.99%) | ( 31) | C | - | H | STRE | (14,65) |
|    |         |        |      | ( 19.58%) | ( 32) | C | - | H | STRE | (14,66) |
| 22 | 2987.33 | 56.45  | 0.00 | ( 47.75%) | ( 90) | C | - | H | STRE | (39,91) |
|    |         |        |      | ( 40.52%) | ( 91) | C | - | H | STRE | (39,92) |
|    |         |        |      | ( 8.39%)  | ( 96) | C | - | H | STRE | (40,96) |
| 23 | 2987.15 | 34.01  | 0.00 | ( 58.72%) | ( 26) | C | - | H | STRE | (13,61) |
|    |         |        |      | ( 28.34%) | ( 27) | C | - | H | STRE | (13,62) |
|    |         |        |      | ( 9.07%)  | ( 31) | C | - | H | STRE | (14,65) |
| 24 | 2983.39 | 34.40  | 0.00 | ( 7.25%)  | ( 91) | C | - | H | STRE | (39,92) |
|    |         |        |      | ( 30.07%) | ( 95) | C | - | H | STRE | (40,95) |
|    |         |        |      | ( 56.89%) | ( 96) | C | - | H | STRE | (40,96) |
| 25 | 2975.64 | 107.61 | 0.01 | ( 17.98%) | ( 90) | C | - | H | STRE | (39,91) |
|    |         |        |      | ( 23.73%) | ( 91) | C | - | H | STRE | (39,92) |
|    |         |        |      | ( 36.32%) | ( 92) | C | - | H | STRE | (39,93) |
|    |         |        |      | ( 12.38%) | ( 94) | C | - | H | STRE | (40,94) |
|    |         |        |      | ( 8.21%)  | ( 95) | C | - | H | STRE | (40,95) |
| 26 | 2974.66 | 151.67 | 0.01 | ( 6.08%)  | ( 26) | C | - | H | STRE | (13,61) |
|    |         |        |      | ( 26.51%) | ( 27) | C | - | H | STRE | (13,62) |
|    |         |        |      | ( 32.75%) | ( 28) | C | - | H | STRE | (13,63) |
|    |         |        |      | ( 14.98%) | ( 30) | C | - | H | STRE | (14,64) |
|    |         |        |      | ( 17.37%) | ( 32) | C | - | H | STRE | (14,66) |
| 27 | 2971.17 | 17.19  | 0.00 | ( 7.83%)  | ( 90) | C | - | H | STRE | (39,91) |
|    |         |        |      | ( 8.99%)  | ( 92) | C | - | H | STRE | (39,93) |

|    |         |        |      |                                    |
|----|---------|--------|------|------------------------------------|
|    |         |        |      | ( 47.46%) ( 94) C - H STRE (40,94) |
|    |         |        |      | ( 22.18%) ( 95) C - H STRE (40,95) |
|    |         |        |      | ( 8.89%) ( 96) C - H STRE (40,96)  |
| 28 | 2970.46 | 9.68   | 0.00 | ( 6.02%) ( 26) C - H STRE (13,61)  |
|    |         |        |      | ( 11.38%) ( 27) C - H STRE (13,62) |
|    |         |        |      | ( 17.37%) ( 28) C - H STRE (13,63) |
|    |         |        |      | ( 26.36%) ( 30) C - H STRE (14,64) |
|    |         |        |      | ( 35.45%) ( 32) C - H STRE (14,66) |
| 29 | 2955.89 | 30.44  | 0.00 | ( 44.71%) ( 78) C - H STRE (36,85) |
|    |         |        |      | ( 45.82%) ( 79) C - H STRE (36,86) |
| 30 | 2955.80 | 7.85   | 0.01 | ( 45.33%) ( 74) C - H STRE (35,82) |
|    |         |        |      | ( 45.21%) ( 76) C - H STRE (35,84) |
| 31 | 2953.50 | 17.03  | 0.01 | ( 44.49%) ( 82) C - H STRE (37,88) |
|    |         |        |      | ( 55.55%) ( 83) C - H STRE (37,89) |
| 32 | 2953.10 | 17.98  | 0.01 | ( 55.60%) ( 35) C - H STRE (15,68) |
|    |         |        |      | ( 44.45%) ( 36) C - H STRE (15,69) |
| 33 | 2948.69 | 72.94  | 0.01 | ( 43.79%) ( 66) C - H STRE (32,46) |
|    |         |        |      | ( 47.69%) ( 67) C - H STRE (32,47) |
| 34 | 2948.34 | 53.67  | 0.01 | ( 5.56%) ( 1) C - H STRE ( 2,48)   |
|    |         |        |      | ( 47.71%) ( 4) C - H STRE ( 3,50)  |
|    |         |        |      | ( 41.49%) ( 5) C - H STRE ( 3,51)  |
| 35 | 2933.01 | 95.15  | 0.01 | ( 62.36%) ( 22) C - H STRE (12,58) |
|    |         |        |      | ( 25.98%) ( 24) C - H STRE (12,60) |
| 36 | 2932.73 | 105.35 | 0.01 | ( 15.66%) ( 67) C - H STRE (32,47) |
|    |         |        |      | ( 63.39%) ( 69) C - H STRE (33,80) |
|    |         |        |      | ( 16.32%) ( 70) C - H STRE (33,81) |
| 37 | 2931.78 | 91.72  | 0.01 | ( 15.75%) ( 1) C - H STRE ( 2,48)  |
|    |         |        |      | ( 56.72%) ( 2) C - H STRE ( 2,49)  |
|    |         |        |      | ( 17.22%) ( 5) C - H STRE ( 3,51)  |
| 38 | 2929.44 | 44.56  | 0.01 | ( 44.19%) ( 87) C - H STRE (38,43) |
|    |         |        |      | ( 55.59%) ( 88) C - H STRE (38,44) |
| 39 | 2917.26 | 67.14  | 0.01 | ( 5.60%) ( 1) C - H STRE ( 2,48)   |
|    |         |        |      | ( 9.34%) ( 2) C - H STRE ( 2,49)   |
|    |         |        |      | ( 20.85%) ( 4) C - H STRE ( 3,50)  |
|    |         |        |      | ( 20.92%) ( 5) C - H STRE ( 3,51)  |
|    |         |        |      | ( 32.85%) ( 7) C - H STRE ( 4,52)  |
| 40 | 2915.01 | 35.03  | 0.01 | ( 6.35%) ( 63) C - H STRE (31,41)  |
|    |         |        |      | ( 24.86%) ( 66) C - H STRE (32,46) |
|    |         |        |      | ( 17.18%) ( 67) C - H STRE (32,47) |
|    |         |        |      | ( 7.42%) ( 69) C - H STRE (33,80)  |
|    |         |        |      | ( 5.80%) ( 70) C - H STRE (33,81)  |
|    |         |        |      | ( 12.13%) ( 92) C - H STRE (39,93) |
|    |         |        |      | ( 7.45%) ( 94) C - H STRE (40,94)  |
|    |         |        |      | ( 6.62%) ( 95) C - H STRE (40,95)  |
| 41 | 2914.67 | 49.21  | 0.01 | ( 10.33%) ( 26) C - H STRE (13,61) |
|    |         |        |      | ( 14.78%) ( 27) C - H STRE (13,62) |
|    |         |        |      | ( 23.13%) ( 28) C - H STRE (13,63) |
|    |         |        |      | ( 21.59%) ( 30) C - H STRE (14,64) |
|    |         |        |      | ( 9.60%) ( 31) C - H STRE (14,65)  |

|    |         |        |      |           |       |   |   |   |      |          |
|----|---------|--------|------|-----------|-------|---|---|---|------|----------|
|    |         |        |      | ( 10.64%) | ( 32) | C | - | H | STRE | ( 14,66) |
| 42 | 2913.93 | 59.16  | 0.01 | ( 15.20%) | ( 66) | C | - | H | STRE | ( 32,46) |
|    |         |        |      | ( 14.11%) | ( 67) | C | - | H | STRE | ( 32,47) |
|    |         |        |      | ( 5.82%)  | ( 92) | C | - | H | STRE | ( 39,93) |
|    |         |        |      | ( 18.59%) | ( 94) | C | - | H | STRE | ( 40,94) |
|    |         |        |      | ( 18.72%) | ( 95) | C | - | H | STRE | ( 40,95) |
|    |         |        |      | ( 11.89%) | ( 96) | C | - | H | STRE | ( 40,96) |
| 43 | 2912.65 | 1.61   | 0.01 | ( 17.18%) | ( 74) | C | - | H | STRE | ( 35,82) |
|    |         |        |      | ( 17.27%) | ( 76) | C | - | H | STRE | ( 35,84) |
|    |         |        |      | ( 28.89%) | ( 78) | C | - | H | STRE | ( 36,85) |
|    |         |        |      | ( 28.04%) | ( 79) | C | - | H | STRE | ( 36,86) |
|    |         |        |      | ( 5.20%)  | ( 80) | C | - | H | STRE | ( 36,87) |
| 44 | 2912.35 | 94.17  | 0.00 | ( 28.35%) | ( 74) | C | - | H | STRE | ( 35,82) |
|    |         |        |      | ( 5.25%)  | ( 75) | C | - | H | STRE | ( 35,83) |
|    |         |        |      | ( 28.50%) | ( 76) | C | - | H | STRE | ( 35,84) |
|    |         |        |      | ( 17.54%) | ( 78) | C | - | H | STRE | ( 36,85) |
|    |         |        |      | ( 17.02%) | ( 79) | C | - | H | STRE | ( 36,86) |
| 45 | 2910.54 | 73.48  | 0.03 | ( 50.51%) | ( 82) | C | - | H | STRE | ( 37,88) |
|    |         |        |      | ( 38.63%) | ( 83) | C | - | H | STRE | ( 37,89) |
|    |         |        |      | ( 8.02%)  | ( 84) | C | - | H | STRE | ( 37,90) |
| 46 | 2910.06 | 149.62 | 0.01 | ( 7.64%)  | ( 34) | C | - | H | STRE | ( 15,67) |
|    |         |        |      | ( 36.78%) | ( 35) | C | - | H | STRE | ( 15,68) |
|    |         |        |      | ( 48.18%) | ( 36) | C | - | H | STRE | ( 15,69) |
| 47 | 2909.83 | 8.65   | 0.00 | ( 9.64%)  | ( 26) | C | - | H | STRE | ( 13,61) |
|    |         |        |      | ( 13.29%) | ( 27) | C | - | H | STRE | ( 13,62) |
|    |         |        |      | ( 22.90%) | ( 28) | C | - | H | STRE | ( 13,63) |
|    |         |        |      | ( 25.01%) | ( 30) | C | - | H | STRE | ( 14,64) |
|    |         |        |      | ( 9.47%)  | ( 31) | C | - | H | STRE | ( 14,65) |
|    |         |        |      | ( 11.49%) | ( 32) | C | - | H | STRE | ( 14,66) |
| 48 | 2908.95 | 16.27  | 0.00 | ( 14.82%) | ( 90) | C | - | H | STRE | ( 39,91) |
|    |         |        |      | ( 15.80%) | ( 91) | C | - | H | STRE | ( 39,92) |
|    |         |        |      | ( 35.39%) | ( 92) | C | - | H | STRE | ( 39,93) |
|    |         |        |      | ( 12.70%) | ( 94) | C | - | H | STRE | ( 40,94) |
|    |         |        |      | ( 10.76%) | ( 95) | C | - | H | STRE | ( 40,95) |
|    |         |        |      | ( 7.43%)  | ( 96) | C | - | H | STRE | ( 40,96) |
| 49 | 2905.73 | 11.77  | 0.00 | ( 26.33%) | ( 4)  | C | - | H | STRE | ( 3,50)  |
|    |         |        |      | ( 13.26%) | ( 5)  | C | - | H | STRE | ( 3,51)  |
|    |         |        |      | ( 50.62%) | ( 7)  | C | - | H | STRE | ( 4,52)  |
| 50 | 2897.60 | 33.95  | 0.01 | ( 70.98%) | ( 63) | C | - | H | STRE | ( 31,41) |
|    |         |        |      | ( 8.75%)  | ( 66) | C | - | H | STRE | ( 32,46) |
|    |         |        |      | ( 6.24%)  | ( 87) | C | - | H | STRE | ( 38,43) |
|    |         |        |      | ( 5.57%)  | ( 88) | C | - | H | STRE | ( 38,44) |
| 51 | 2892.13 | 36.28  | 0.01 | ( 23.61%) | ( 22) | C | - | H | STRE | ( 12,58) |
|    |         |        |      | ( 5.27%)  | ( 23) | C | - | H | STRE | ( 12,59) |
|    |         |        |      | ( 57.23%) | ( 24) | C | - | H | STRE | ( 12,60) |
| 52 | 2892.06 | 56.30  | 0.01 | ( 8.83%)  | ( 63) | C | - | H | STRE | ( 31,41) |
|    |         |        |      | ( 5.45%)  | ( 86) | C | - | H | STRE | ( 38,42) |
|    |         |        |      | ( 42.79%) | ( 87) | C | - | H | STRE | ( 38,43) |
|    |         |        |      | ( 31.22%) | ( 88) | C | - | H | STRE | ( 38,44) |
| 53 | 2891.58 | 30.41  | 0.00 | ( 66.57%) | ( 1)  | C | - | H | STRE | ( 2,48)  |

|    |         |       |        |           |       |               |      |         |
|----|---------|-------|--------|-----------|-------|---------------|------|---------|
|    |         |       |        | ( 24.52%) | ( 2)  | C - H         | STRE | ( 2,49) |
| 54 | 2890.94 | 38.73 | 0.00   | ( 22.61%) | ( 69) | C - H         | STRE | (33,80) |
|    |         |       |        | ( 72.13%) | ( 70) | C - H         | STRE | (33,81) |
| 55 | 2862.33 | 57.79 | 0.02   | ( 7.45%)  | ( 63) | C - H         | STRE | (31,41) |
|    |         |       |        | ( 90.86%) | ( 64) | C - H         | STRE | (31,45) |
| 56 | 2859.04 | 34.40 | 0.02   | ( 94.62%) | ( 8)  | C - H         | STRE | ( 4,53) |
| 57 | 1633.51 | 6.25  | 0.07   | ( 7.59%)  | ( 12) | C = C         | STRE | ( 6, 5) |
|    |         |       |        | ( 6.77%)  | ( 16) | C = C         | STRE | ( 8, 7) |
|    |         |       |        | ( 14.66%) | ( 60) | C = C         | STRE | (28,27) |
|    |         |       |        | ( 25.90%) | ( 62) | C = C         | STRE | (30,29) |
|    |         |       |        | ( 5.53%)  | (202) | secd XY, C84- | H39  | ROCK    |
| 58 | 1632.59 | 41.86 | 0.01   | ( 25.29%) | ( 12) | C = C         | STRE | ( 6, 5) |
|    |         |       |        | ( 16.69%) | ( 16) | C = C         | STRE | ( 8, 7) |
|    |         |       |        | ( 5.23%)  | ( 60) | C = C         | STRE | (28,27) |
|    |         |       |        | ( 13.72%) | ( 62) | C = C         | STRE | (30,29) |
|    |         |       |        | ( 6.04%)  | (131) | secd XY, C63- | H14  | ROCK    |
| 59 | 1624.85 | 0.68  | 0.52   | ( 11.20%) | ( 12) | C = C         | STRE | ( 6, 5) |
|    |         |       |        | ( 6.39%)  | ( 39) | C = C         | STRE | (16,11) |
|    |         |       |        | ( 8.77%)  | ( 46) | C = C         | STRE | (20,19) |
|    |         |       |        | ( 8.03%)  | ( 53) | C = C         | STRE | (24,23) |
|    |         |       |        | ( 9.30%)  | ( 62) | C = C         | STRE | (30,29) |
| 60 | 1618.85 | 1.54  | 0.01   | ( 7.23%)  | ( 19) | C = C         | STRE | (10, 9) |
|    |         |       |        | ( 7.95%)  | ( 42) | C = C         | STRE | (18,17) |
|    |         |       |        | ( 7.50%)  | ( 49) | C = C         | STRE | (22,21) |
|    |         |       |        | ( 6.21%)  | ( 56) | C = C         | STRE | (26,25) |
| 61 | 1607.97 | 19.70 | 0.02   | ( 9.21%)  | ( 12) | C = C         | STRE | ( 6, 5) |
|    |         |       |        | ( 5.73%)  | ( 16) | C = C         | STRE | ( 8, 7) |
|    |         |       |        | ( 9.59%)  | ( 42) | C = C         | STRE | (18,17) |
|    |         |       |        | ( 9.79%)  | ( 49) | C = C         | STRE | (22,21) |
|    |         |       |        | ( 6.79%)  | ( 60) | C = C         | STRE | (28,27) |
|    |         |       |        | ( 7.84%)  | ( 62) | C = C         | STRE | (30,29) |
| 62 | 1599.70 | 2.92  | 6.89   | ( 9.02%)  | ( 12) | C = C         | STRE | ( 6, 5) |
|    |         |       |        | ( 13.79%) | ( 16) | C = C         | STRE | ( 8, 7) |
|    |         |       |        | ( 5.01%)  | ( 46) | C = C         | STRE | (20,19) |
|    |         |       |        | ( 14.22%) | ( 60) | C = C         | STRE | (28,27) |
|    |         |       |        | ( 7.37%)  | ( 62) | C = C         | STRE | (30,29) |
| 63 | 1589.63 | 0.04  | 3.90   | ( 18.84%) | ( 19) | C = C         | STRE | (10, 9) |
|    |         |       |        | ( 8.68%)  | ( 46) | C = C         | STRE | (20,19) |
|    |         |       |        | ( 18.37%) | ( 56) | C = C         | STRE | (26,25) |
| 64 | 1576.53 | 71.55 | 0.03   | ( 7.48%)  | ( 19) | C = C         | STRE | (10, 9) |
|    |         |       |        | ( 6.56%)  | ( 42) | C = C         | STRE | (18,17) |
|    |         |       |        | ( 6.38%)  | ( 49) | C = C         | STRE | (22,21) |
|    |         |       |        | ( 7.44%)  | ( 56) | C = C         | STRE | (26,25) |
| 65 | 1571.54 | 57.97 | 0.00   | ( 11.76%) | ( 19) | C = C         | STRE | (10, 9) |
|    |         |       |        | ( 13.09%) | ( 39) | C = C         | STRE | (16,11) |
|    |         |       |        | ( 13.11%) | ( 53) | C = C         | STRE | (24,23) |
|    |         |       |        | ( 12.59%) | ( 56) | C = C         | STRE | (26,25) |
| 66 | 1535.07 | 0.76  | 100.00 | ( 11.62%) | ( 39) | C = C         | STRE | (16,11) |
|    |         |       |        | ( 20.28%) | ( 46) | C = C         | STRE | (20,19) |
|    |         |       |        | ( 11.73%) | ( 53) | C = C         | STRE | (24,23) |



|    |         |       |       |                                                                                                                                                                                                              |
|----|---------|-------|-------|--------------------------------------------------------------------------------------------------------------------------------------------------------------------------------------------------------------|
|    |         |       |       | ( 5.19%) (143)secd XY, C67- H17 ROCK                                                                                                                                                                         |
|    |         |       |       | ( 9.44%) (175)secd XY, C75- H32 ROCK                                                                                                                                                                         |
|    |         |       |       | ( 9.51%) (178)secd XY, C76- H33 ROCK                                                                                                                                                                         |
|    |         |       |       | ( 5.27%) (190)secd XY, C80- H36 ROCK                                                                                                                                                                         |
| 67 | 1527.99 | 0.11  | 47.28 | ( 22.36%) ( 42) C = C STRE (18,17)<br>( 22.66%) ( 49) C = C STRE (22,21)                                                                                                                                     |
| 68 | 1492.27 | 1.28  | 0.03  | ( 9.84%) (114)ring sXY2, X= C58 SCIS<br>( 72.36%) (118)ring sXY2, X= C59 SCIS<br>( 8.87%) (122)ring sXY2, X= C60 SCIS                                                                                        |
| 69 | 1491.80 | 2.46  | 0.03  | ( 7.42%) (208)ring sXY2, X= C87 SCIS<br>( 76.12%) (212)ring sXY2, X= C88 SCIS<br>( 8.71%) (216)ring sXY2, X= C89 SCIS                                                                                        |
| 70 | 1485.33 | 6.05  | 0.01  | ( 64.14%) (114)ring sXY2, X= C58 SCIS<br>( 5.09%) (118)ring sXY2, X= C59 SCIS<br>( 16.89%) (157)prim XY3 , X= C70 ADEFb                                                                                      |
| 71 | 1483.09 | 4.47  | 0.01  | ( 5.28%) (212)ring sXY2, X= C88 SCIS<br>( 64.89%) (216)ring sXY2, X= C89 SCIS<br>( 14.60%) (246)prim XY3 , X= C95 ADEFb<br>( 5.33%) (251)prim XY3 , X= C96 ADEFb                                             |
| 72 | 1475.63 | 7.79  | 0.07  | ( 7.20%) (212)ring sXY2, X= C88 SCIS<br>( 12.60%) (246)prim XY3 , X= C95 ADEFb<br>( 53.50%) (250)prim XY3 , X= C96 ADEFa<br>( 10.56%) (251)prim XY3 , X= C96 ADEFb                                           |
| 73 | 1473.35 | 4.98  | 0.02  | ( 8.07%) (114)ring sXY2, X= C58 SCIS<br>( 6.72%) (118)ring sXY2, X= C59 SCIS<br>( 33.68%) (152)prim XY3 , X= C69 ADEFb<br>( 37.20%) (156)prim XY3 , X= C70 ADEFa                                             |
| 74 | 1472.33 | 2.30  | 0.03  | ( 6.83%) (216)ring sXY2, X= C89 SCIS<br>( 36.23%) (245)prim XY3 , X= C95 ADEFa<br>( 24.15%) (250)prim XY3 , X= C96 ADEFa<br>( 19.64%) (251)prim XY3 , X= C96 ADEFb                                           |
| 75 | 1469.28 | 5.60  | 0.03  | ( 6.63%) (114)ring sXY2, X= C58 SCIS<br>( 11.26%) (122)ring sXY2, X= C60 SCIS<br>( 42.30%) (151)prim XY3 , X= C69 ADEFa<br>( 5.39%) (156)prim XY3 , X= C70 ADEFa<br>( 21.95%) (157)prim XY3 , X= C70 ADEFb   |
| 76 | 1466.90 | 4.71  | 0.13  | ( 9.52%) (118)ring sXY2, X= C59 SCIS<br>( 65.78%) (122)ring sXY2, X= C60 SCIS<br>( 5.57%) (157)prim XY3 , X= C70 ADEFb                                                                                       |
| 77 | 1465.08 | 16.21 | 0.02  | ( 7.86%) (161)prim XY3 , X= C71 ADEFa<br>( 16.05%) (208)ring sXY2, X= C87 SCIS<br>( 20.38%) (225)prim XY3 , X= C91 ADEFa<br>( 19.53%) (230)prim XY3 , X= C92 ADEFa<br>( 12.87%) (235)prim XY3 , X= C93 ADEFa |
| 78 | 1464.76 | 11.59 | 0.08  | ( 55.03%) (208)ring sXY2, X= C87 SCIS<br>( 5.88%) (216)ring sXY2, X= C89 SCIS<br>( 6.68%) (225)prim XY3 , X= C91 ADEFa<br>( 6.69%) (230)prim XY3 , X= C92 ADEFa<br>( 9.32%) (241)prim XY3 , X= C94 ADEFb     |
| 79 | 1462.04 | 0.19  | 1.41  | ( 16.60%) (161)prim XY3 , X= C71 ADEFa                                                                                                                                                                       |

|    |         |       |      |                                        |
|----|---------|-------|------|----------------------------------------|
|    |         |       |      | ( 8.43%) (230)prim XY3 , X= C92 ADEFa  |
|    |         |       |      | ( 55.88%) (235)prim XY3 , X= C93 ADEFa |
| 80 | 1461.51 | 1.13  | 0.19 | ( 50.00%) (161)prim XY3 , X= C71 ADEFa |
|    |         |       |      | ( 16.29%) (225)prim XY3 , X= C91 ADEFa |
|    |         |       |      | ( 8.28%) (230)prim XY3 , X= C92 ADEFa  |
|    |         |       |      | ( 7.99%) (235)prim XY3 , X= C93 ADEFa  |
| 81 | 1459.74 | 25.53 | 0.05 | ( 10.93%) (146)prim XY3 , X= C68 ADEFa |
|    |         |       |      | ( 77.48%) (147)prim XY3 , X= C68 ADEFb |
|    |         |       |      | ( 6.28%) (149)prim XY3 , X= C68 ROCKb  |
| 82 | 1457.60 | 1.25  | 0.00 | ( 53.45%) (246)prim XY3 , X= C95 ADEFb |
|    |         |       |      | ( 5.44%) (250)prim XY3 , X= C96 ADEFa  |
|    |         |       |      | ( 18.56%) (251)prim XY3 , X= C96 ADEFb |
| 83 | 1456.98 | 14.93 | 0.32 | ( 6.61%) (208)ring sXY2, X= C87 SCIS   |
|    |         |       |      | ( 8.08%) (240)prim XY3 , X= C94 ADEFa  |
|    |         |       |      | ( 63.12%) (241)prim XY3 , X= C94 ADEFb |
|    |         |       |      | ( 5.27%) (243)prim XY3 , X= C94 ROCKb  |
| 84 | 1456.12 | 4.39  | 9.34 | ( 29.65%) (225)prim XY3 , X= C91 ADEFa |
|    |         |       |      | ( 29.23%) (230)prim XY3 , X= C92 ADEFa |
|    |         |       |      | ( 8.50%) (241)prim XY3 , X= C94 ADEFb  |
| 85 | 1455.93 | 5.35  | 0.26 | ( 37.64%) (151)prim XY3 , X= C69 ADEFa |
|    |         |       |      | ( 5.73%) (152)prim XY3 , X= C69 ADEFb  |
|    |         |       |      | ( 36.72%) (157)prim XY3 , X= C70 ADEFb |
| 86 | 1454.92 | 6.59  | 1.03 | ( 78.65%) (240)prim XY3 , X= C94 ADEFa |
| 87 | 1453.88 | 3.96  | 0.95 | ( 74.34%) (146)prim XY3 , X= C68 ADEFa |
|    |         |       |      | ( 9.55%) (147)prim XY3 , X= C68 ADEFb  |
| 88 | 1452.86 | 1.56  | 0.02 | ( 43.75%) (152)prim XY3 , X= C69 ADEFb |
|    |         |       |      | ( 43.62%) (156)prim XY3 , X= C70 ADEFa |
| 89 | 1452.48 | 8.24  | 0.07 | ( 34.04%) (226)prim XY3 , X= C91 ADEFb |
|    |         |       |      | ( 54.97%) (231)prim XY3 , X= C92 ADEFb |
| 90 | 1452.35 | 0.22  | 0.01 | ( 55.09%) (226)prim XY3 , X= C91 ADEFb |
|    |         |       |      | ( 33.57%) (231)prim XY3 , X= C92 ADEFb |
| 91 | 1451.82 | 3.63  | 0.01 | ( 49.01%) (245)prim XY3 , X= C95 ADEFa |
|    |         |       |      | ( 5.42%) (250)prim XY3 , X= C96 ADEFa  |
|    |         |       |      | ( 31.64%) (251)prim XY3 , X= C96 ADEFb |
| 92 | 1449.94 | 10.30 | 0.01 | ( 88.11%) (236)prim XY3 , X= C93 ADEFb |
|    |         |       |      | ( 7.14%) (238)prim XY3 , X= C93 ROCKb  |
| 93 | 1449.70 | 8.98  | 0.00 | ( 88.24%) (162)prim XY3 , X= C71 ADEFb |
|    |         |       |      | ( 7.11%) (164)prim XY3 , X= C71 ROCKb  |
| 94 | 1408.16 | 50.66 | 0.01 | ( 9.07%) (140)secd XY, C66- H16 ROCK   |
|    |         |       |      | ( 8.23%) (172)secd XY, C74- H31 ROCK   |
|    |         |       |      | ( 6.22%) (181)secd XY, C77- H34 ROCK   |
|    |         |       |      | ( 5.85%) (193)secd XY, C81- H37 ROCK   |
| 95 | 1403.47 | 0.76  | 0.93 | ( 9.24%) (140)secd XY, C66- H16 ROCK   |
|    |         |       |      | ( 5.46%) (181)secd XY, C77- H34 ROCK   |
|    |         |       |      | ( 11.36%) (193)secd XY, C81- H37 ROCK  |
|    |         |       |      | ( 6.63%) (229)prim XY3 , X= C92 SDEF   |

|     |         |       |      |                                                                                                                                                                                                                                                 |
|-----|---------|-------|------|-------------------------------------------------------------------------------------------------------------------------------------------------------------------------------------------------------------------------------------------------|
|     |         |       |      | ( 6.29%) (234)prim XY3 , X= C93 SDEF                                                                                                                                                                                                            |
| 96  | 1395.89 | 1.39  | 0.04 | ( 6.04%) (140)secd XY, C66- H16 ROCK<br>( 17.66%) (160)prim XY3 , X= C71 SDEF<br>( 6.55%) (172)secd XY, C74- H31 ROCK<br>( 10.64%) (224)prim XY3 , X= C91 SDEF<br>( 10.03%) (234)prim XY3 , X= C93 SDEF                                         |
| 97  | 1395.30 | 0.11  | 0.72 | ( 5.46%) (160)prim XY3 , X= C71 SDEF<br>( 7.25%) (181)secd XY, C77- H34 ROCK<br>( 9.72%) (224)prim XY3 , X= C91 SDEF<br>( 17.23%) (229)prim XY3 , X= C92 SDEF<br>( 15.36%) (234)prim XY3 , X= C93 SDEF                                          |
| 98  | 1389.53 | 4.36  | 0.03 | ( 7.70%) (116)ring sXY2, X= C58 WAGG<br>( 43.86%) (150)prim XY3 , X= C69 SDEF<br>( 39.00%) (155)prim XY3 , X= C70 SDEF                                                                                                                          |
| 99  | 1387.57 | 3.75  | 0.05 | ( 10.52%) (218)ring sXY2, X= C89 WAGG<br>( 42.11%) (244)prim XY3 , X= C95 SDEF<br>( 37.00%) (249)prim XY3 , X= C96 SDEF                                                                                                                         |
| 100 | 1379.49 | 7.81  | 0.00 | ( 88.63%) (145)prim XY3 , X= C68 SDEF                                                                                                                                                                                                           |
| 101 | 1379.17 | 1.06  | 0.00 | ( 86.61%) (239)prim XY3 , X= C94 SDEF                                                                                                                                                                                                           |
| 102 | 1376.89 | 76.83 | 0.00 | ( 10.80%) (160)prim XY3 , X= C71 SDEF<br>( 29.68%) (224)prim XY3 , X= C91 SDEF<br>( 28.18%) (229)prim XY3 , X= C92 SDEF<br>( 9.66%) (234)prim XY3 , X= C93 SDEF                                                                                 |
| 103 | 1372.87 | 6.27  | 0.08 | ( 8.82%) (116)ring sXY2, X= C58 WAGG<br>( 9.19%) (120)ring sXY2, X= C59 WAGG<br>( 19.27%) (124)ring sXY2, X= C60 WAGG<br>( 13.34%) (160)prim XY3 , X= C71 SDEF<br>( 5.13%) (229)prim XY3 , X= C92 SDEF<br>( 9.62%) (234)prim XY3 , X= C93 SDEF  |
| 104 | 1371.31 | 55.51 | 0.06 | ( 6.62%) (116)ring sXY2, X= C58 WAGG<br>( 7.58%) (120)ring sXY2, X= C59 WAGG<br>( 10.69%) (124)ring sXY2, X= C60 WAGG<br>( 10.66%) (210)ring sXY2, X= C87 WAGG<br>( 6.74%) (224)prim XY3 , X= C91 SDEF<br>( 13.15%) (234)prim XY3 , X= C93 SDEF |
| 105 | 1369.62 | 22.74 | 0.11 | ( 11.97%) (160)prim XY3 , X= C71 SDEF<br>( 18.47%) (210)ring sXY2, X= C87 WAGG<br>( 6.96%) (214)ring sXY2, X= C88 WAGG<br>( 12.47%) (218)ring sXY2, X= C89 WAGG<br>( 5.74%) (229)prim XY3 , X= C92 SDEF<br>( 5.92%) (249)prim XY3 , X= C96 SDEF |
| 106 | 1367.04 | 2.45  | 0.00 | ( 6.27%) (140)secd XY, C66- H16 ROCK<br>( 15.73%) (160)prim XY3 , X= C71 SDEF<br>( 5.49%) (172)secd XY, C74- H31 ROCK<br>( 7.45%) (193)secd XY, C81- H37 ROCK<br>( 6.37%) (224)prim XY3 , X= C91 SDEF<br>( 16.89%) (234)prim XY3 , X= C93 SDEF  |
| 107 | 1366.16 | 3.16  | 0.00 | ( 43.42%) (150)prim XY3 , X= C69 SDEF<br>( 46.51%) (155)prim XY3 , X= C70 SDEF                                                                                                                                                                  |
| 108 | 1364.90 | 3.85  | 0.01 | ( 11.14%) (214)ring sXY2, X= C88 WAGG                                                                                                                                                                                                           |

|     |         |       |      |                                                                                                                                                                                                                                                                                  |
|-----|---------|-------|------|----------------------------------------------------------------------------------------------------------------------------------------------------------------------------------------------------------------------------------------------------------------------------------|
|     |         |       |      | ( 37.69%) (244)prim XY3 , X= C95 SDEF                                                                                                                                                                                                                                            |
|     |         |       |      | ( 35.82%) (249)prim XY3 , X= C96 SDEF                                                                                                                                                                                                                                            |
| 109 | 1363.54 | 0.14  | 1.45 | ( 9.38%) (172)secd XY, C74- H31 ROCK<br>( 10.64%) (181)secd XY, C77- H34 ROCK<br>( 15.11%) (224)prim XY3 , X= C91 SDEF<br>( 16.53%) (229)prim XY3 , X= C92 SDEF                                                                                                                  |
| 110 | 1362.04 | 2.37  | 0.24 | ( 18.84%) (210)ring sXY2, X= C87 WAGG<br>( 14.23%) (214)ring sXY2, X= C88 WAGG<br>( 10.08%) (215)ring sXY2, X= C88 TWIST<br>( 10.41%) (219)ring sXY2, X= C89 TWIST<br>( 7.13%) (244)prim XY3 , X= C95 SDEF<br>( 8.92%) (249)prim XY3 , X= C96 SDEF                               |
| 111 | 1359.78 | 7.83  | 0.13 | ( 6.50%) ( 9) C - C STRE ( 4, 3)<br>( 13.62%) (117)ring sXY2, X= C58 TWIST<br>( 23.48%) (120)ring sXY2, X= C59 WAGG<br>( 10.77%) (121)ring sXY2, X= C59 TWIST<br>( 24.30%) (124)ring sXY2, X= C60 WAGG                                                                           |
| 112 | 1352.26 | 0.63  | 0.02 | ( 46.84%) (116)ring sXY2, X= C58 WAGG<br>( 20.82%) (120)ring sXY2, X= C59 WAGG<br>( 8.90%) (121)ring sXY2, X= C59 TWIST                                                                                                                                                          |
| 113 | 1350.78 | 0.26  | 0.01 | ( 5.23%) (210)ring sXY2, X= C87 WAGG<br>( 31.93%) (214)ring sXY2, X= C88 WAGG<br>( 6.38%) (215)ring sXY2, X= C88 TWIST<br>( 36.72%) (218)ring sXY2, X= C89 WAGG<br>( 6.58%) (244)prim XY3 , X= C95 SDEF                                                                          |
| 114 | 1331.49 | 0.69  | 0.08 | ( 5.58%) ( 39) C = C STRE (16,11)<br>( 11.66%) (166)secd XY, C72- H30 ROCK<br>( 9.75%) (187)secd XY, C79- H35 ROCK                                                                                                                                                               |
| 115 | 1329.72 | 54.38 | 0.01 | ( 6.14%) ( 60) C = C STRE (28,27)<br>( 7.23%) (166)secd XY, C72- H30 ROCK<br>( 7.49%) (187)secd XY, C79- H35 ROCK<br>( 5.91%) (199)secd XY, C83- H38 ROCK<br>( 5.30%) (202)secd XY, C84- H39 ROCK                                                                                |
| 116 | 1323.76 | 1.55  | 1.22 | ( 12.84%) ( 60) C = C STRE (28,27)<br>( 41.40%) (202)secd XY, C84- H39 ROCK                                                                                                                                                                                                      |
| 117 | 1321.06 | 0.56  | 0.75 | ( 15.80%) ( 16) C = C STRE ( 8, 7)<br>( 40.12%) (131)secd XY, C63- H14 ROCK<br>( 7.46%) (134)secd XY, C64- H15 ROCK                                                                                                                                                              |
| 118 | 1313.60 | 0.01  | 0.52 | ( 11.56%) ( 46) C = C STRE (20,19)<br>( 5.51%) (131)secd XY, C63- H14 ROCK<br>( 8.88%) (175)secd XY, C75- H32 ROCK<br>( 8.98%) (178)secd XY, C76- H33 ROCK                                                                                                                       |
| 119 | 1310.55 | 8.37  | 0.00 | ( 9.61%) ( 39) C = C STRE (16,11)<br>( 5.05%) ( 53) C = C STRE (24,23)<br>( 10.61%) (134)secd XY, C64- H15 ROCK<br>( 10.21%) (143)secd XY, C67- H17 ROCK<br>( 8.47%) (166)secd XY, C72- H30 ROCK<br>( 6.66%) (190)secd XY, C80- H36 ROCK<br>( 6.47%) (199)secd XY, C83- H38 ROCK |
| 120 | 1308.42 | 0.43  | 0.53 | ( 8.91%) ( 53) C = C STRE (24,23)                                                                                                                                                                                                                                                |

|     |         |       |      |                                       |
|-----|---------|-------|------|---------------------------------------|
|     |         |       |      | ( 6.38%) (175)secd XY, C75- H32 ROCK  |
|     |         |       |      | ( 6.64%) (178)secd XY, C76- H33 ROCK  |
|     |         |       |      | ( 8.05%) (187)secd XY, C79- H35 ROCK  |
|     |         |       |      | ( 8.68%) (190)secd XY, C80- H36 ROCK  |
|     |         |       |      | ( 9.69%) (199)secd XY, C83- H38 ROCK  |
| 121 | 1298.99 | 19.49 | 0.00 | ( 6.58%) ( 40) C - C STRE (17,16)     |
|     |         |       |      | ( 6.78%) ( 51) C - C STRE (23,22)     |
|     |         |       |      | (13.99%) (175)secd XY, C75- H32 ROCK  |
|     |         |       |      | (12.78%) (178)secd XY, C76- H33 ROCK  |
| 122 | 1288.11 | 2.60  | 1.72 | (17.68%) (211)ring sXY2, X= C87 TWIST |
|     |         |       |      | (32.50%) (219)ring sXY2, X= C89 TWIST |
| 123 | 1286.39 | 1.97  | 0.53 | (31.25%) (117)ring sXY2, X= C58 TWIST |
|     |         |       |      | (19.42%) (125)ring sXY2, X= C60 TWIST |
| 124 | 1279.32 | 0.61  | 8.12 | ( 5.00%) (134)secd XY, C64- H15 ROCK  |
|     |         |       |      | (17.62%) (143)secd XY, C67- H17 ROCK  |
|     |         |       |      | (18.05%) (190)secd XY, C80- H36 ROCK  |
|     |         |       |      | ( 5.80%) (199)secd XY, C83- H38 ROCK  |
| 125 | 1277.72 | 6.85  | 0.00 | (15.74%) (143)secd XY, C67- H17 ROCK  |
|     |         |       |      | ( 6.27%) (166)secd XY, C72- H30 ROCK  |
|     |         |       |      | ( 6.32%) (175)secd XY, C75- H32 ROCK  |
|     |         |       |      | ( 5.84%) (178)secd XY, C76- H33 ROCK  |
|     |         |       |      | ( 6.61%) (187)secd XY, C79- H35 ROCK  |
|     |         |       |      | (14.46%) (190)secd XY, C80- H36 ROCK  |
| 126 | 1266.16 | 8.80  | 0.05 | ( 5.21%) ( 73) C - C STRE (34,33)     |
|     |         |       |      | (12.35%) (199)secd XY, C83- H38 ROCK  |
|     |         |       |      | (11.29%) (202)secd XY, C84- H39 ROCK  |
|     |         |       |      | (10.91%) (211)ring sXY2, X= C87 TWIST |
|     |         |       |      | ( 7.78%) (215)ring sXY2, X= C88 TWIST |
|     |         |       |      | ( 5.13%) (218)ring sXY2, X= C89 WAGG  |
|     |         |       |      | ( 7.41%) (222)ring tXY2, X= C90 WAGG  |
|     |         |       |      | ( 6.25%) (253)prim XY3 , X= C96 ROCKb |
| 127 | 1265.25 | 9.43  | 0.09 | ( 5.20%) ( 3) C - C STRE ( 2, 1)      |
|     |         |       |      | ( 7.29%) (112)ring tXY2, X= C57 WAGG  |
|     |         |       |      | ( 5.57%) (116)ring sXY2, X= C58 WAGG  |
|     |         |       |      | ( 9.35%) (121)ring sXY2, X= C59 TWIST |
|     |         |       |      | ( 9.81%) (125)ring sXY2, X= C60 TWIST |
|     |         |       |      | (13.47%) (131)secd XY, C63- H14 ROCK  |
|     |         |       |      | (11.21%) (134)secd XY, C64- H15 ROCK  |
|     |         |       |      | ( 6.49%) (154)prim XY3 , X= C69 ROCKb |
| 128 | 1226.59 | 0.25  | 5.56 | ( 5.98%) ( 21) C - C STRE (11,10)     |
|     |         |       |      | ( 6.52%) ( 40) C - C STRE (17,16)     |
|     |         |       |      | ( 8.67%) ( 46) C = C STRE (20,19)     |
|     |         |       |      | ( 5.93%) ( 51) C - C STRE (23,22)     |
|     |         |       |      | ( 5.38%) ( 55) C - C STRE (25,24)     |
|     |         |       |      | ( 8.03%) (140)secd XY, C66- H16 ROCK  |
|     |         |       |      | ( 5.18%) (172)secd XY, C74- H31 ROCK  |
|     |         |       |      | ( 7.03%) (193)secd XY, C81- H37 ROCK  |
| 129 | 1217.41 | 47.44 | 0.06 | ( 5.26%) ( 3) C - C STRE ( 2, 1)      |
|     |         |       |      | ( 7.77%) ( 33) C - C STRE (14, 1)     |
|     |         |       |      | ( 5.57%) (100) 6-membered ring BEND   |
|     |         |       |      | ( 9.54%) (115)ring sXY2, X= C58 ROCK  |
|     |         |       |      | (21.06%) (125)ring sXY2, X= C60 TWIST |
|     |         |       |      | (13.97%) (153)prim XY3 , X= C69 ROCKa |

|     |         |       |       |                                                                                                                                                                                                                                                                                    |
|-----|---------|-------|-------|------------------------------------------------------------------------------------------------------------------------------------------------------------------------------------------------------------------------------------------------------------------------------------|
| 130 | 1216.42 | 5.42  | 0.01  | ( 5.78%) ( 73) C - C STRE (34,33)<br>( 9.34%) ( 93) C - C STRE (39,34)<br>( 22.69%) (211)ring sXY2, X= C87 TWIST<br>( 10.25%) (217)ring sXY2, X= C89 ROCK<br>( 13.86%) (252)prim XY3 , X= C96 ROCKa                                                                                |
| 131 | 1210.68 | 6.87  | 0.18  | ( 16.94%) (121)ring sXY2, X= C59 TWIST<br>( 6.04%) (140)secd XY, C66- H16 ROCK<br>( 5.93%) (193)secd XY, C81- H37 ROCK                                                                                                                                                             |
| 132 | 1209.40 | 11.41 | 0.01  | ( 15.42%) (121)ring sXY2, X= C59 TWIST<br>( 5.79%) (140)secd XY, C66- H16 ROCK<br>( 5.98%) (193)secd XY, C81- H37 ROCK                                                                                                                                                             |
| 133 | 1207.86 | 2.02  | 0.03  | ( 8.40%) ( 97) C - C STRE (40,34)<br>( 6.06%) (210)ring sXY2, X= C87 WAGG<br>( 32.23%) (215)ring sXY2, X= C88 TWIST<br>( 6.30%) (221)ring tXY2, X= C90 ROCK<br>( 6.26%) (247)prim XY3 , X= C95 ROCKa<br>( 6.07%) (248)prim XY3 , X= C95 ROCKb                                      |
| 134 | 1205.19 | 7.03  | 0.17  | ( 6.72%) ( 40) C - C STRE (17,16)<br>( 5.97%) ( 51) C - C STRE (23,22)<br>( 5.53%) (166)secd XY, C72- H30 ROCK<br>( 13.84%) (172)secd XY, C74- H31 ROCK<br>( 10.70%) (175)secd XY, C75- H32 ROCK<br>( 11.04%) (178)secd XY, C76- H33 ROCK<br>( 12.59%) (181)secd XY, C77- H34 ROCK |
| 135 | 1198.16 | 0.23  | 42.76 | ( 6.65%) ( 17) C - C STRE ( 9, 8)<br>( 8.41%) ( 58) C - C STRE (27,26)<br>( 5.42%) (140)secd XY, C66- H16 ROCK<br>( 6.48%) (166)secd XY, C72- H30 ROCK<br>( 8.22%) (187)secd XY, C79- H35 ROCK<br>( 7.20%) (193)secd XY, C81- H37 ROCK                                             |
| 136 | 1187.63 | 1.26  | 0.12  | ( 5.35%) ( 21) C - C STRE (11,10)<br>( 19.40%) ( 44) C - C STRE (19,18)<br>( 21.19%) ( 48) C - C STRE (21,20)<br>( 6.25%) ( 55) C - C STRE (25,24)<br>( 5.29%) (143)secd XY, C67- H17 ROCK<br>( 5.29%) (190)secd XY, C80- H36 ROCK                                                 |
| 137 | 1180.84 | 2.46  | 0.25  | ( 14.03%) ( 65) C - C STRE (31,30)<br>( 18.44%) ( 89) C - C STRE (38,30)<br>( 5.62%) (106) 6-membered ring BEND<br>( 6.93%) (210)ring sXY2, X= C87 WAGG<br>( 11.59%) (242)prim XY3 , X= C94 ROCKa                                                                                  |
| 138 | 1179.79 | 2.28  | 0.04  | ( 16.60%) ( 10) C - C STRE ( 5, 4)<br>( 16.40%) ( 25) C - C STRE (12, 5)<br>( 9.18%) (124)ring sXY2, X= C60 WAGG<br>( 5.38%) (126)ring tXY C68- C61 ROCK<br>( 15.48%) (148)prim XY3 , X= C68 ROCKa                                                                                 |
| 139 | 1177.36 | 34.50 | 9.27  | ( 5.12%) ( 72) C - C STRE (34,29)<br>( 5.57%) ( 97) C - C STRE (40,34)<br>( 6.41%) (106) 6-membered ring BEND<br>( 6.90%) (215)ring sXY2, X= C88 TWIST<br>( 7.97%) (219)ring sXY2, X= C89 TWIST<br>( 10.98%) (248)prim XY3 , X= C95 ROCKb                                          |
| 140 | 1173.75 | 10.32 | 7.72  | ( 5.42%) ( 11) C - C STRE ( 6, 1)                                                                                                                                                                                                                                                  |

|     |         |       |       |                                        |
|-----|---------|-------|-------|----------------------------------------|
|     |         |       |       | ( 7.06%) ( 29) C - C STRE (13, 1)      |
|     |         |       |       | ( 9.95%) (100) 6-membered ring BEND    |
|     |         |       |       | ( 9.73%) (117)ring sXY2, X= C58 TWIST  |
|     |         |       |       | ( 12.59%) (159)prim XY3 , X= C70 ROCKb |
| 141 | 1168.13 | 0.44  | 66.66 | ( 12.19%) ( 21) C - C STRE (11,10)     |
|     |         |       |       | ( 13.87%) ( 44) C - C STRE (19,18)     |
|     |         |       |       | ( 13.89%) ( 48) C - C STRE (21,20)     |
|     |         |       |       | ( 11.32%) ( 55) C - C STRE (25,24)     |
| 142 | 1154.75 | 0.94  | 0.02  | ( 12.44%) ( 21) C - C STRE (11,10)     |
|     |         |       |       | ( 10.03%) ( 44) C - C STRE (19,18)     |
|     |         |       |       | ( 7.49%) ( 48) C - C STRE (21,20)      |
|     |         |       |       | ( 11.82%) ( 55) C - C STRE (25,24)     |
| 143 | 1150.81 | 1.21  | 3.70  | ( 5.08%) ( 21) C - C STRE (11,10)      |
|     |         |       |       | ( 6.82%) ( 44) C - C STRE (19,18)      |
|     |         |       |       | ( 8.50%) ( 48) C - C STRE (21,20)      |
|     |         |       |       | ( 7.27%) ( 55) C - C STRE (25,24)      |
| 144 | 1134.73 | 16.08 | 0.23  | ( 5.31%) ( 21) C - C STRE (11,10)      |
|     |         |       |       | ( 8.04%) (117)ring sXY2, X= C58 TWIST  |
|     |         |       |       | ( 5.64%) (119)ring sXY2, X= C59 ROCK   |
|     |         |       |       | ( 8.67%) (123)ring sXY2, X= C60 ROCK   |
|     |         |       |       | ( 13.68%) (125)ring sXY2, X= C60 TWIST |
|     |         |       |       | ( 9.29%) (153)prim XY3 , X= C69 ROCKa  |
| 145 | 1133.81 | 1.16  | 0.11  | ( 5.05%) ( 61) C - C STRE (29,28)      |
|     |         |       |       | ( 7.33%) (209)ring sXY2, X= C87 ROCK   |
|     |         |       |       | ( 14.81%) (211)ring sXY2, X= C87 TWIST |
|     |         |       |       | ( 9.66%) (219)ring sXY2, X= C89 TWIST  |
|     |         |       |       | ( 5.47%) (243)prim XY3 , X= C94 ROCKb  |
|     |         |       |       | ( 9.55%) (252)prim XY3 , X= C96 ROCKa  |
| 146 | 1123.15 | 7.28  | 0.04  | ( 5.47%) ( 55) C - C STRE (25,24)      |
|     |         |       |       | ( 15.61%) ( 61) C - C STRE (29,28)     |
|     |         |       |       | ( 8.13%) (209)ring sXY2, X= C87 ROCK   |
|     |         |       |       | ( 6.46%) (217)ring sXY2, X= C89 ROCK   |
|     |         |       |       | ( 5.42%) (242)prim XY3 , X= C94 ROCKa  |
| 147 | 1122.12 | 1.04  | 0.05  | ( 17.31%) ( 14) C - C STRE ( 7, 6)     |
|     |         |       |       | ( 5.92%) ( 21) C - C STRE (11,10)      |
|     |         |       |       | ( 5.69%) (100) 6-membered ring BEND    |
|     |         |       |       | ( 5.62%) (123)ring sXY2, X= C60 ROCK   |
| 148 | 1060.71 | 5.24  | 0.02  | ( 11.72%) ( 6) C - C STRE ( 3, 2)      |
|     |         |       |       | ( 7.66%) ( 9) C - C STRE ( 4, 3)       |
|     |         |       |       | ( 5.55%) (117)ring sXY2, X= C58 TWIST  |
|     |         |       |       | ( 7.30%) (120)ring sXY2, X= C59 WAGG   |
|     |         |       |       | ( 22.21%) (149)prim XY3 , X= C68 ROCKb |
|     |         |       |       | ( 8.56%) (154)prim XY3 , X= C69 ROCKb  |
| 149 | 1054.44 | 5.23  | 0.04  | ( 5.19%) ( 68) C - C STRE (32,31)      |
|     |         |       |       | ( 10.00%) ( 71) C - C STRE (33,32)     |
|     |         |       |       | ( 6.65%) (214)ring sXY2, X= C88 WAGG   |
|     |         |       |       | ( 6.68%) (219)ring sXY2, X= C89 TWIST  |
|     |         |       |       | ( 20.38%) (243)prim XY3 , X= C94 ROCKb |
|     |         |       |       | ( 5.69%) (252)prim XY3 , X= C96 ROCKa  |
|     |         |       |       | ( 6.63%) (253)prim XY3 , X= C96 ROCKb  |
| 150 | 1048.66 | 3.52  | 0.03  | ( 5.14%) ( 68) C - C STRE (32,31)      |

|     |         |       |      |                                        |
|-----|---------|-------|------|----------------------------------------|
|     |         |       |      | ( 13.26%) (164)prim XY3 , X= C71 ROCKb |
|     |         |       |      | ( 7.01%) (228)prim XY3 , X= C91 ROCKb  |
|     |         |       |      | ( 8.84%) (233)prim XY3 , X= C92 ROCKb  |
|     |         |       |      | ( 26.94%) (238)prim XY3 , X= C93 ROCKb |
| 151 | 1048.26 | 2.33  | 0.06 | ( 5.38%) ( 68) C - C STRE (32,31)      |
|     |         |       |      | ( 39.16%) (164)prim XY3 , X= C71 ROCKb |
|     |         |       |      | ( 9.58%) (228)prim XY3 , X= C91 ROCKb  |
|     |         |       |      | ( 6.50%) (238)prim XY3 , X= C93 ROCKb  |
| 152 | 1047.58 | 1.73  | 0.05 | ( 9.42%) ( 68) C - C STRE (32,31)      |
|     |         |       |      | ( 5.37%) ( 71) C - C STRE (33,32)      |
|     |         |       |      | ( 5.91%) (164)prim XY3 , X= C71 ROCKb  |
|     |         |       |      | ( 9.42%) (233)prim XY3 , X= C92 ROCKb  |
|     |         |       |      | ( 22.80%) (238)prim XY3 , X= C93 ROCKb |
|     |         |       |      | ( 7.14%) (243)prim XY3 , X= C94 ROCKb  |
| 153 | 1046.51 | 3.27  | 0.00 | ( 9.79%) ( 6) C - C STRE ( 3, 2)       |
|     |         |       |      | ( 19.56%) ( 9) C - C STRE ( 4, 3)      |
|     |         |       |      | ( 5.57%) (120)ring sXY2, X= C59 WAGG   |
|     |         |       |      | ( 8.18%) (148)prim XY3 , X= C68 ROCKa  |
|     |         |       |      | ( 6.16%) (153)prim XY3 , X= C69 ROCKa  |
| 154 | 1046.00 | 0.31  | 0.02 | ( 13.06%) (164)prim XY3 , X= C71 ROCKb |
|     |         |       |      | ( 27.43%) (228)prim XY3 , X= C91 ROCKb |
|     |         |       |      | ( 20.72%) (233)prim XY3 , X= C92 ROCKb |
|     |         |       |      | ( 14.20%) (238)prim XY3 , X= C93 ROCKb |
| 155 | 1044.65 | 0.01  | 0.00 | ( 32.15%) (228)prim XY3 , X= C91 ROCKb |
|     |         |       |      | ( 37.33%) (233)prim XY3 , X= C92 ROCKb |
|     |         |       |      | ( 5.68%) (238)prim XY3 , X= C93 ROCKb  |
| 156 | 1035.03 | 0.38  | 0.38 | ( 25.84%) (163)prim XY3 , X= C71 ROCKa |
|     |         |       |      | ( 16.30%) (227)prim XY3 , X= C91 ROCKa |
|     |         |       |      | ( 6.55%) (232)prim XY3 , X= C92 ROCKa  |
|     |         |       |      | ( 10.40%) (237)prim XY3 , X= C93 ROCKa |
| 157 | 1034.80 | 1.06  | 0.02 | ( 9.67%) (163)prim XY3 , X= C71 ROCKa  |
|     |         |       |      | ( 5.75%) (227)prim XY3 , X= C91 ROCKa  |
|     |         |       |      | ( 15.86%) (232)prim XY3 , X= C92 ROCKa |
|     |         |       |      | ( 26.46%) (237)prim XY3 , X= C93 ROCKa |
| 158 | 1018.06 | 11.98 | 3.90 | ( 15.32%) (149)prim XY3 , X= C68 ROCKb |
|     |         |       |      | ( 10.03%) (154)prim XY3 , X= C69 ROCKb |
|     |         |       |      | ( 8.71%) (158)prim XY3 , X= C70 ROCKa  |
|     |         |       |      | ( 7.78%) (159)prim XY3 , X= C70 ROCKb  |
|     |         |       |      | ( 16.13%) (227)prim XY3 , X= C91 ROCKa |
| 159 | 1017.48 | 11.01 | 3.55 | ( 7.58%) ( 72) C - C STRE (34,29)      |
|     |         |       |      | ( 10.88%) ( 89) C - C STRE (38,30)     |
|     |         |       |      | ( 7.53%) (232)prim XY3 , X= C92 ROCKa  |
|     |         |       |      | ( 5.85%) (242)prim XY3 , X= C94 ROCKa  |
|     |         |       |      | ( 5.05%) (247)prim XY3 , X= C95 ROCKa  |
|     |         |       |      | ( 11.90%) (248)prim XY3 , X= C95 ROCKb |
| 160 | 1016.63 | 14.23 | 5.44 | ( 17.21%) (232)prim XY3 , X= C92 ROCKa |
|     |         |       |      | ( 13.55%) (243)prim XY3 , X= C94 ROCKb |
|     |         |       |      | ( 11.14%) (247)prim XY3 , X= C95 ROCKa |
|     |         |       |      | ( 18.68%) (253)prim XY3 , X= C96 ROCKb |
| 161 | 1014.44 | 16.50 | 6.95 | ( 14.01%) (149)prim XY3 , X= C68 ROCKb |
|     |         |       |      | ( 13.30%) (154)prim XY3 , X= C69 ROCKb |
|     |         |       |      | ( 8.15%) (163)prim XY3 , X= C71 ROCKa  |



|     |         |       |      |                                                                                                                                                                                                                                                                                                                             |
|-----|---------|-------|------|-----------------------------------------------------------------------------------------------------------------------------------------------------------------------------------------------------------------------------------------------------------------------------------------------------------------------------|
|     |         |       |      | ( 14.14%) (227)prim XY3 , X= C91 ROCKa                                                                                                                                                                                                                                                                                      |
| 162 | 1007.97 | 31.24 | 7.22 | ( 15.06%) (232)prim XY3 , X= C92 ROCKa<br>( 14.92%) (237)prim XY3 , X= C93 ROCKa<br>( 7.41%) (253)prim XY3 , X= C96 ROCKb                                                                                                                                                                                                   |
| 163 | 1006.53 | 33.49 | 6.70 | ( 5.85%) ( 25) C - C STRE (12, 5)<br>( 6.27%) (132)secd XY, C63- H14 OUT<br>( 5.83%) (135)secd XY, C64- H15 OUT<br>( 5.81%) (148)prim XY3 , X= C68 ROCKa<br>( 5.62%) (159)prim XY3 , X= C70 ROCKb<br>( 11.80%) (163)prim XY3 , X= C71 ROCKa<br>( 9.69%) (227)prim XY3 , X= C91 ROCKa<br>( 5.09%) (255)torsion C64- C63 TORS |
| 164 | 1000.52 | 55.73 | 3.70 | ( 16.45%) (135)secd XY, C64- H15 OUT<br>( 10.80%) (255)torsion C64- C63 TORS                                                                                                                                                                                                                                                |
| 165 | 998.81  | 57.29 | 0.26 | ( 8.66%) (188)secd XY, C79- H35 OUT<br>( 10.68%) (200)secd XY, C83- H38 OUT<br>( 8.16%) (267)torsion C76- C75 TORS<br>( 5.91%) (271)torsion C80- C79 TORS<br>( 6.00%) (275)torsion C84- C83 TORS                                                                                                                            |
| 166 | 995.64  | 0.43  | 0.93 | ( 19.97%) (200)secd XY, C83- H38 OUT<br>( 7.40%) (267)torsion C76- C75 TORS<br>( 13.35%) (275)torsion C84- C83 TORS                                                                                                                                                                                                         |
| 167 | 992.07  | 4.81  | 1.01 | ( 7.17%) (135)secd XY, C64- H15 OUT<br>( 9.59%) (149)prim XY3 , X= C68 ROCKb<br>( 5.31%) (153)prim XY3 , X= C69 ROCKa<br>( 11.85%) (158)prim XY3 , X= C70 ROCKa                                                                                                                                                             |
| 168 | 988.05  | 0.52  | 0.11 | ( 7.25%) (209)ring sXY2, X= C87 ROCK<br>( 12.42%) (213)ring sXY2, X= C88 ROCK<br>( 5.77%) (217)ring sXY2, X= C89 ROCK<br>( 14.33%) (243)prim XY3 , X= C94 ROCKb<br>( 14.34%) (247)prim XY3 , X= C95 ROCKa<br>( 7.64%) (252)prim XY3 , X= C96 ROCKa<br>( 10.79%) (253)prim XY3 , X= C96 ROCKb                                |
| 169 | 985.66  | 1.22  | 0.03 | ( 5.60%) (135)secd XY, C64- H15 OUT<br>( 5.68%) (144)secd XY, C67- H17 OUT<br><br>( 12.35%) (167)secd XY, C72- H30 OUT<br>( 9.33%) (188)secd XY, C79- H35 OUT<br>( 6.66%) (255)torsion C64- C63 TORS<br>( 10.73%) (263)torsion C72- C67 TORS<br>( 7.79%) (271)torsion C80- C79 TORS<br>( 5.56%) (275)torsion C84- C83 TORS  |
| 170 | 982.22  | 1.38  | 0.59 | ( 6.64%) (167)secd XY, C72- H30 OUT<br>( 10.49%) (188)secd XY, C79- H35 OUT<br>( 6.95%) (191)secd XY, C80- H36 OUT<br>( 8.15%) (263)torsion C72- C67 TORS<br>( 6.55%) (267)torsion C76- C75 TORS<br>( 12.03%) (271)torsion C80- C79 TORS                                                                                    |
| 171 | 973.99  | 10.63 | 0.36 | ( 6.60%) ( 65) C - C STRE (31,30)<br>( 10.37%) ( 71) C - C STRE (33,32)<br>( 6.51%) ( 73) C - C STRE (34,33)<br>( 12.69%) (213)ring sXY2, X= C88 ROCK<br>( 14.71%) (242)prim XY3 , X= C94 ROCKa                                                                                                                             |

|     |        |       |      |                                                                                                                                                                                                                                                                               |
|-----|--------|-------|------|-------------------------------------------------------------------------------------------------------------------------------------------------------------------------------------------------------------------------------------------------------------------------------|
|     |        |       |      | ( 7.78%) (253)prim XY3 , X= C96 ROCKb                                                                                                                                                                                                                                         |
| 172 | 968.24 | 11.00 | 0.33 | ( 7.94%) ( 3) C - C STRE ( 2, 1)<br>( 6.37%) ( 6) C - C STRE ( 3, 2)<br>( 18.25%) (119)ring sXY2, X= C59 ROCK<br>( 14.99%) (148)prim XY3 , X= C68 ROCKa<br>( 9.74%) (154)prim XY3 , X= C69 ROCKb<br>( 6.11%) (159)prim XY3 , X= C70 ROCKb                                     |
| 173 | 928.50 | 0.46  | 0.01 | ( 26.44%) (173)secd XY, C74- H31 OUT<br>( 26.02%) (182)secd XY, C77- H34 OUT                                                                                                                                                                                                  |
| 174 | 924.39 | 0.45  | 0.01 | ( 21.05%) ( 68) C - C STRE (32,31)<br>( 11.54%) ( 73) C - C STRE (34,33)<br>( 7.28%) ( 89) C - C STRE (38,30)<br>( 8.10%) ( 93) C - C STRE (39,34)<br>( 6.75%) ( 97) C - C STRE (40,34)<br>( 5.61%) (242)prim XY3 , X= C94 ROCKa<br>( 6.31%) (247)prim XY3 , X= C95 ROCKa     |
| 175 | 923.64 | 0.05  | 0.01 | ( 9.71%) ( 3) C - C STRE ( 2, 1)<br>( 15.41%) ( 9) C - C STRE ( 4, 3)<br>( 5.93%) ( 25) C - C STRE (12, 5)<br>( 19.49%) ( 29) C - C STRE (13, 1)<br>( 5.15%) (148)prim XY3 , X= C68 ROCKa<br>( 13.06%) (158)prim XY3 , X= C70 ROCKa<br>( 15.69%) (159)prim XY3 , X= C70 ROCKb |
| 176 | 918.99 | 0.33  | 0.54 | ( 7.52%) (132)secd XY, C63- H14 OUT<br>( 34.00%) (141)secd XY, C66- H16 OUT<br>( 8.09%) (144)secd XY, C67- H17 OUT<br>( 11.13%) (194)secd XY, C81- H37 OUT<br>( 5.63%) (257)torsion C66- C65 TORS                                                                             |
| 177 | 918.48 | 0.32  | 0.01 | ( 13.97%) ( 93) C - C STRE (39,34)<br>( 21.82%) ( 97) C - C STRE (40,34)<br>( 5.63%) (247)prim XY3 , X= C95 ROCKa<br>( 23.71%) (248)prim XY3 , X= C95 ROCKb<br>( 22.47%) (252)prim XY3 , X= C96 ROCKa                                                                         |
| 178 | 917.08 | 3.26  | 0.09 | ( 7.62%) (141)secd XY, C66- H16 OUT<br>( 5.44%) (144)secd XY, C67- H17 OUT<br>( 12.40%) (191)secd XY, C80- H36 OUT<br>( 32.03%) (194)secd XY, C81- H37 OUT<br>( 6.23%) (203)secd XY, C84- H39 OUT                                                                             |
| 179 | 916.46 | 0.70  | 0.06 | ( 7.03%) ( 9) C - C STRE ( 4, 3)<br>( 7.53%) ( 29) C - C STRE (13, 1)<br>( 23.48%) ( 33) C - C STRE (14, 1)<br>( 25.33%) (153)prim XY3 , X= C69 ROCKa<br><br>( 9.84%) (159)prim XY3 , X= C70 ROCKb                                                                            |
| 180 | 908.14 | 0.05  | 0.00 | ( 9.68%) (144)secd XY, C67- H17 OUT<br>( 19.90%) (173)secd XY, C74- H31 OUT<br>( 8.77%) (176)secd XY, C75- H32 OUT<br>( 8.89%) (179)secd XY, C76- H33 OUT<br>( 20.14%) (182)secd XY, C77- H34 OUT<br>( 9.79%) (191)secd XY, C80- H36 OUT                                      |
| 181 | 895.52 | 15.16 | 0.00 | ( 5.26%) ( 72) C - C STRE (34,29)<br>( 8.06%) ( 89) C - C STRE (38,30)                                                                                                                                                                                                        |

|     |        |       |      |                                       |
|-----|--------|-------|------|---------------------------------------|
|     |        |       |      | ( 5.27%) (106) 6-membered ring BEND   |
|     |        |       |      | ( 5.30%) (203)secd XY, C84- H39 OUT   |
|     |        |       |      | ( 13.68%) (217)ring sXY2, X= C89 ROCK |
|     |        |       |      | ( 6.39%) (242)prim XY3 , X= C94 ROCKa |
| 182 | 895.21 | 20.94 | 0.01 | ( 6.24%) ( 11) C - C STRE ( 6, 1)     |
|     |        |       |      | ( 7.93%) ( 25) C - C STRE (12, 5)     |
|     |        |       |      | ( 5.51%) (100) 6-membered ring BEND   |
|     |        |       |      | ( 17.47%) (115)ring sXY2, X= C58 ROCK |
|     |        |       |      | ( 5.54%) (130)skel, C62 C64 C63 BEND  |
|     |        |       |      | ( 8.01%) (148)prim XY3 , X= C68 ROCKa |
| 183 | 881.34 | 0.11  | 0.01 | ( 7.12%) (144)secd XY, C67- H17 OUT   |
|     |        |       |      | ( 6.27%) (167)secd XY, C72- H30 OUT   |
|     |        |       |      | ( 32.14%) (176)secd XY, C75- H32 OUT  |
|     |        |       |      | ( 31.31%) (179)secd XY, C76- H33 OUT  |
|     |        |       |      | ( 5.74%) (188)secd XY, C79- H35 OUT   |
|     |        |       |      | ( 6.04%) (191)secd XY, C80- H36 OUT   |
| 184 | 872.65 | 10.00 | 0.11 | ( 21.13%) ( 6) C - C STRE ( 3, 2)     |
|     |        |       |      | ( 9.21%) ( 9) C - C STRE ( 4, 3)      |
|     |        |       |      | ( 7.63%) ( 29) C - C STRE (13, 1)     |
|     |        |       |      | ( 5.25%) ( 33) C - C STRE (14, 1)     |
|     |        |       |      | ( 16.85%) (123)ring sXY2, X= C60 ROCK |
|     |        |       |      | ( 6.41%) (132)secd XY, C63- H14 OUT   |
| 185 | 870.19 | 1.19  | 0.12 | ( 8.93%) ( 68) C - C STRE (32,31)     |
|     |        |       |      | ( 14.36%) ( 71) C - C STRE (33,32)    |
|     |        |       |      | ( 8.25%) ( 85) C - C STRE (37,26)     |
|     |        |       |      | ( 6.77%) (209)ring sXY2, X= C87 ROCK  |
| 186 | 868.55 | 4.77  | 0.11 | ( 7.07%) ( 37) C - C STRE (15, 9)     |
|     |        |       |      | ( 14.06%) (132)secd XY, C63- H14 OUT  |
|     |        |       |      | ( 9.13%) (135)secd XY, C64- H15 OUT   |
|     |        |       |      | ( 5.76%) (144)secd XY, C67- H17 OUT   |
| 187 | 863.65 | 2.92  | 0.02 | ( 5.39%) ( 93) C - C STRE (39,34)     |
|     |        |       |      | ( 5.69%) (176)secd XY, C75- H32 OUT   |
|     |        |       |      | ( 5.68%) (182)secd XY, C77- H34 OUT   |
|     |        |       |      | ( 9.44%) (188)secd XY, C79- H35 OUT   |
|     |        |       |      | ( 11.27%) (191)secd XY, C80- H36 OUT  |
|     |        |       |      | ( 7.34%) (200)secd XY, C83- H38 OUT   |
|     |        |       |      | ( 13.53%) (203)secd XY, C84- H39 OUT  |
| 188 | 860.60 | 1.50  | 0.31 | ( 5.03%) ( 37) C - C STRE (15, 9)     |
|     |        |       |      | ( 16.27%) ( 77) C - C STRE (35,17)    |
|     |        |       |      | ( 15.37%) ( 81) C - C STRE (36,22)    |
|     |        |       |      | ( 5.60%) (167)secd XY, C72- H30 OUT   |
| 189 | 854.35 | 2.07  | 0.42 | ( 5.46%) ( 81) C - C STRE (36,22)     |
|     |        |       |      | ( 12.24%) (144)secd XY, C67- H17 OUT  |
|     |        |       |      | ( 18.83%) (167)secd XY, C72- H30 OUT  |
|     |        |       |      | ( 7.35%) (173)secd XY, C74- H31 OUT   |
|     |        |       |      | ( 5.17%) (179)secd XY, C76- H33 OUT   |
| 190 | 852.42 | 6.22  | 0.46 | ( 6.95%) ( 77) C - C STRE (35,17)     |
|     |        |       |      | ( 5.17%) (182)secd XY, C77- H34 OUT   |
|     |        |       |      | ( 14.20%) (188)secd XY, C79- H35 OUT  |
|     |        |       |      | ( 8.13%) (191)secd XY, C80- H36 OUT   |
|     |        |       |      | ( 6.03%) (200)secd XY, C83- H38 OUT   |
|     |        |       |      | ( 10.13%) (203)secd XY, C84- H39 OUT  |

|     |        |      |      |                                                                                                                                                                                                                                                                              |
|-----|--------|------|------|------------------------------------------------------------------------------------------------------------------------------------------------------------------------------------------------------------------------------------------------------------------------------|
| 191 | 846.09 | 1.10 | 0.02 | ( 5.91%) (115)ring sXY2, X= C58 ROCK<br>( 6.19%) (123)ring sXY2, X= C60 ROCK<br>( 13.54%) (209)ring sXY2, X= C87 ROCK<br>( 12.15%) (217)ring sXY2, X= C89 ROCK                                                                                                               |
| 192 | 845.38 | 1.09 | 0.00 | ( 11.34%) (115)ring sXY2, X= C58 ROCK<br>( 14.35%) (123)ring sXY2, X= C60 ROCK<br>( 16.71%) (209)ring sXY2, X= C87 ROCK<br>( 10.22%) (217)ring sXY2, X= C89 ROCK                                                                                                             |
| 193 | 842.76 | 4.46 | 0.02 | ( 8.93%) ( 77) C - C STRE (35,17)<br>( 9.57%) ( 81) C - C STRE (36,22)<br>( 7.06%) (123)ring sXY2, X= C60 ROCK                                                                                                                                                               |
| 194 | 820.15 | 0.07 | 0.03 | ( 16.08%) ( 37) C - C STRE (15, 9)<br>( 5.64%) ( 77) C - C STRE (35,17)<br>( 7.02%) ( 81) C - C STRE (36,22)<br>( 16.94%) ( 85) C - C STRE (37,26)                                                                                                                           |
| 195 | 809.64 | 1.78 | 0.00 | ( 10.54%) ( 37) C - C STRE (15, 9)<br>( 17.99%) ( 77) C - C STRE (35,17)<br>( 17.11%) ( 81) C - C STRE (36,22)<br>( 9.01%) ( 85) C - C STRE (37,26)                                                                                                                          |
| 196 | 780.01 | 4.22 | 0.13 | ( 9.74%) ( 65) C - C STRE (31,30)<br>( 15.57%) ( 73) C - C STRE (34,33)<br>( 6.96%) ( 89) C - C STRE (38,30)<br>( 16.57%) ( 93) C - C STRE (39,34)<br>( 8.41%) ( 97) C - C STRE (40,34)                                                                                      |
| 197 | 777.25 | 3.97 | 0.14 | ( 15.43%) ( 3) C - C STRE ( 2, 1)<br>( 10.81%) ( 10) C - C STRE ( 5, 4)<br>( 7.40%) ( 25) C - C STRE (12, 5)<br>( 8.92%) ( 29) C - C STRE (13, 1)<br>( 16.02%) ( 33) C - C STRE (14, 1)                                                                                      |
| 198 | 729.21 | 7.72 | 0.01 | ( 5.75%) ( 3) C - C STRE ( 2, 1)<br>( 10.59%) ( 10) C - C STRE ( 5, 4)<br>( 7.49%) ( 33) C - C STRE (14, 1)<br>( 10.44%) (119)ring sXY2, X= C59 ROCK<br>( 6.60%) (129)ring tXY C63- C62 WAGG<br>( 7.75%) (130)skel, C62 C64 C63 BEND<br>( 5.31%) (133)skel, C63 C65 C64 BEND |
| 199 | 723.32 | 5.20 | 0.01 | ( 11.91%) ( 65) C - C STRE (31,30)<br>( 7.65%) ( 73) C - C STRE (34,33)<br>( 7.45%) (198)skel, C82 C84 C83 BEND<br>( 8.56%) (201)skel, C83 C85 C84 BEND<br>( 10.98%) (213)ring sXY2, X= C88 ROCK                                                                             |
| 200 | 663.76 | 0.85 | 0.01 | ( 7.35%) (171)skel, C73 C75 C74 BEND<br>( 7.79%) (180)skel, C76 C78 C77 BEND<br>( 5.31%) (186)skel, C78 C80 C79 BEND<br>( 14.09%) (205)ring tXY C84- C85 WAGG                                                                                                                |
| 201 | 659.04 | 6.56 | 0.03 | ( 5.50%) (171)skel, C73 C75 C74 BEND<br>( 14.57%) (205)ring tXY C84- C85 WAGG<br>( 5.17%) (221)ring tXY2, X= C90 ROCK                                                                                                                                                        |
| 202 | 641.89 | 8.46 | 0.01 | ( 16.31%) (129)ring tXY C63- C62 WAGG<br>( 5.50%) (184)tert XY3 , X= C78 ADEFa<br>( 7.22%) (186)skel, C78 C80 C79 BEND                                                                                                                                                       |

|     |        |      |      |                                                                                                                                                                                                                                                |
|-----|--------|------|------|------------------------------------------------------------------------------------------------------------------------------------------------------------------------------------------------------------------------------------------------|
| 203 | 630.39 | 2.42 | 0.00 | ( 12.78%) (129)ring tXY C63- C62 WAGG<br>( 5.59%) (139)skel, C65 C67 C66 BEND<br>( 9.56%) (165)skel, C67 C73 C72 BEND<br>( 7.45%) (169)tert XY3 , X= C73 ADEFa<br><br>( 5.85%) (186)skel, C78 C80 C79 BEND                                     |
| 204 | 604.62 | 0.99 | 0.00 | ( 7.78%) (138)tert XY3 , X= C65 ADEFb<br>( 14.36%) (139)skel, C65 C67 C66 BEND<br>( 5.94%) (186)skel, C78 C80 C79 BEND<br>( 6.31%) (192)skel, C80 C82 C81 BEND                                                                                 |
| 205 | 595.43 | 0.28 | 0.03 | ( 6.01%) (185)tert XY3 , X= C78 ADEFb<br>( 10.45%) (192)skel, C80 C82 C81 BEND<br>( 6.93%) (196)tert XY3 , X= C82 ADEFa                                                                                                                        |
| 206 | 567.50 | 7.90 | 0.04 | ( 10.53%) ( 11) C - C STRE ( 6, 1)<br>( 11.15%) ( 25) C - C STRE (12, 5)<br>( 9.66%) ( 29) C - C STRE (13, 1)<br>( 24.76%) (100) 6-membered ring BEND<br>( 5.83%) (115)ring sXY2, X= C58 ROCK<br>( 5.47%) (119)ring sXY2, X= C59 ROCK          |
| 207 | 566.73 | 2.85 | 0.01 | ( 9.98%) ( 72) C - C STRE (34,29)<br>( 11.33%) ( 89) C - C STRE (38,30)<br>( 8.50%) ( 97) C - C STRE (40,34)<br>( 24.74%) (106) 6-membered ring BEND<br>( 5.08%) (213)ring sXY2, X= C88 ROCK<br>( 6.14%) (217)ring sXY2, X= C89 ROCK           |
| 208 | 538.01 | 3.18 | 0.00 | ( 6.52%) (136)t-planXY3umbr C65 SOUT<br>( 5.24%) (168)t-planXY3umbr C73 SOUT<br>( 7.58%) (183)t-planXY3umbr C78 SOUT<br>( 11.96%) (195)t-planXY3umbr C82 SOUT<br>( 6.32%) (204)ring tXY C84- C85 ROCK                                          |
| 209 | 534.58 | 0.04 | 0.00 | ( 11.89%) (136)t-planXY3umbr C65 SOUT<br>( 6.63%) (168)t-planXY3umbr C73 SOUT<br>( 5.87%) (183)t-planXY3umbr C78 SOUT<br>( 10.96%) (195)t-planXY3umbr C82 SOUT                                                                                 |
| 210 | 530.65 | 3.34 | 0.00 | ( 19.76%) (168)t-planXY3umbr C73 SOUT<br>( 14.61%) (183)t-planXY3umbr C78 SOUT                                                                                                                                                                 |
| 211 | 525.91 | 0.56 | 0.21 | ( 9.52%) (168)t-planXY3umbr C73 SOUT<br>( 9.25%) (170)tert XY3 , X= C73 ADEFb<br>( 6.30%) (174)skel, C74 C76 C75 BEND<br>( 5.88%) (177)skel, C75 C77 C76 BEND<br>( 9.15%) (183)t-planXY3umbr C78 SOUT<br>( 8.23%) (185)tert XY3 , X= C78 ADEFb |
| 212 | 522.53 | 1.19 | 0.25 | ( 7.23%) (168)t-planXY3umbr C73 SOUT<br>( 6.93%) (170)tert XY3 , X= C73 ADEFb<br>( 15.11%) (183)t-planXY3umbr C78 SOUT                                                                                                                         |
| 213 | 519.50 | 1.36 | 0.09 | ( 6.54%) (136)t-planXY3umbr C65 SOUT<br>( 5.05%) (168)t-planXY3umbr C73 SOUT                                                                                                                                                                   |
| 214 | 492.47 | 3.10 | 0.23 | ( 5.65%) ( 98) 6-membered ring BEND<br>( 6.77%) (111)ring tXY2, X= C57 ROCK<br>( 29.25%) (136)t-planXY3umbr C65 SOUT<br>( 5.03%) (137)tert XY3 , X= C65 ADEFa                                                                                  |

|     |        |      |      |                                                                                                                                                                                                                                                                                    |
|-----|--------|------|------|------------------------------------------------------------------------------------------------------------------------------------------------------------------------------------------------------------------------------------------------------------------------------------|
| 215 | 489.15 | 0.33 | 0.06 | ( 7.76%) ( 99) 6-membered ring BEND<br>( 8.69%) (105) 6-membered ring BEND<br><br>( 14.84%) (195)t-planXY3umbr C82 SOUT<br>( 5.94%) (197)tert XY3 , X= C82 ADEFb                                                                                                                   |
| 216 | 479.44 | 0.40 | 0.11 | ( 13.73%) ( 99) 6-membered ring BEND<br>( 8.08%) (104) 6-membered ring BEND<br>( 5.49%) (105) 6-membered ring BEND<br>( 9.78%) (195)t-planXY3umbr C82 SOUT<br>( 7.03%) (222)ring tXY2, X= C90 WAGG                                                                                 |
| 217 | 474.09 | 6.45 | 0.01 | ( 10.94%) ( 98) 6-membered ring BEND<br>( 12.29%) ( 99) 6-membered ring BEND<br><br>( 8.63%) (104) 6-membered ring BEND<br>( 5.09%) (110)ring tXY2, X= C57 SCIS<br>( 5.09%) (137)tert XY3 , X= C65 ADEFa                                                                           |
| 218 | 470.94 | 1.84 | 0.07 | ( 5.47%) ( 97) C - C STRE (40,34)<br>( 5.12%) ( 98) 6-membered ring BEND<br>( 21.59%) (105) 6-membered ring BEND<br>( 5.31%) (196)tert XY3 , X= C82 ADEFa<br>( 5.49%) (220)ring tXY2, X= C90 SCIS<br>( 8.11%) (221)ring tXY2, X= C90 ROCK                                          |
| 219 | 446.99 | 1.97 | 0.01 | ( 5.52%) ( 98) 6-membered ring BEND<br>( 14.17%) (138)tert XY3 , X= C65 ADEFb<br>( 13.66%) (169)tert XY3 , X= C73 ADEFa<br>( 10.01%) (184)tert XY3 , X= C78 ADEFa<br>( 9.95%) (197)tert XY3 , X= C82 ADEFb                                                                         |
| 220 | 432.89 | 0.27 | 0.06 | ( 11.19%) ( 98) 6-membered ring BEND<br>( 6.87%) (112)ring tXY2, X= C57 WAGG<br>( 15.70%) (126)ring tXY C68- C61 ROCK<br>( 6.81%) (127)ring tXY C68- C61 WAGG<br>( 6.10%) (265)torsion C74- C73 TORS<br>( 8.64%) (267)torsion C76- C75 TORS<br>( 5.49%) (269)torsion C78- C77 TORS |
| 221 | 430.41 | 0.67 | 0.08 | ( 13.84%) (126)ring tXY C68- C61 ROCK<br>( 9.56%) (265)torsion C74- C73 TORS<br>( 14.78%) (267)torsion C76- C75 TORS<br>( 10.09%) (269)torsion C78- C77 TORS                                                                                                                       |
| 222 | 421.78 | 0.57 | 0.05 | ( 5.05%) ( 73) C - C STRE (34,33)<br>( 12.91%) (104) 6-membered ring BEND<br>( 10.25%) (206)ring tXY C94- C86 ROCK<br>( 10.43%) (207)ring tXY C94- C86 WAGG<br>( 23.10%) (222)ring tXY2, X= C90 WAGG                                                                               |
| 223 | 412.13 | 3.89 | 0.18 | ( 5.09%) (110)ring tXY2, X= C57 SCIS<br>( 15.32%) (111)ring tXY2, X= C57 ROCK<br><br>( 12.68%) (112)ring tXY2, X= C57 WAGG<br>( 42.99%) (127)ring tXY C68- C61 WAGG                                                                                                                |
| 224 | 402.98 | 5.41 | 0.24 | ( 15.42%) (105) 6-membered ring BEND<br>( 45.44%) (207)ring tXY C94- C86 WAGG<br>( 14.49%) (221)ring tXY2, X= C90 ROCK                                                                                                                                                             |
| 225 | 394.79 | 1.06 | 0.00 | ( 15.28%) (170)tert XY3 , X= C73 ADEFb<br>( 6.50%) (171)skel, C73 C75 C74 BEND                                                                                                                                                                                                     |

|     |        |      |      |                                        |
|-----|--------|------|------|----------------------------------------|
|     |        |      |      | ( 6.09%) (174)skel, C74 C76 C75 BEND   |
|     |        |      |      | ( 6.06%) (177)skel, C75 C77 C76 BEND   |
|     |        |      |      | ( 6.81%) (180)skel, C76 C78 C77 BEND   |
|     |        |      |      | ( 15.25%) (185)tert XY3 , X= C78 ADEFb |
| 226 | 384.78 | 1.09 | 0.12 | ( 5.56%) ( 11) C - C STRE ( 6, 1)      |
|     |        |      |      | ( 19.66%) ( 98) 6-membered ring BEND   |
|     |        |      |      | ( 6.87%) (101) 6-membered ring TORS    |
|     |        |      |      | ( 12.42%) (111)ring tXY2, X= C57 ROCK  |
|     |        |      |      | ( 6.13%) (112)ring tXY2, X= C57 WAGG   |
|     |        |      |      | ( 17.41%) (126)ring tXY C68- C61 ROCK  |
| 227 | 374.81 | 0.95 | 0.01 | ( 9.76%) (109) 6-membered ring TORS    |
|     |        |      |      | ( 5.09%) (204)ring tXY C84- C85 ROCK   |
|     |        |      |      | ( 23.90%) (206)ring tXY C94- C86 ROCK  |
|     |        |      |      | ( 7.65%) (223)ring tXY2, X= C90 TWIST  |
|     |        |      |      | ( 5.37%) (273)torsion C82- C81 TORS    |
| 228 | 371.34 | 0.54 | 0.09 | ( 7.54%) (138)tert XY3 , X= C65 ADEFb  |
|     |        |      |      | ( 5.87%) (142)skel, C66 C72 C67 BEND   |
|     |        |      |      | ( 5.83%) (174)skel, C74 C76 C75 BEND   |
| 229 | 367.02 | 0.60 | 0.01 | ( 5.33%) (103) 6-membered ring TORS    |
|     |        |      |      | ( 5.87%) (126)ring tXY C68- C61 ROCK   |
|     |        |      |      | ( 10.78%) (128)ring tXY C63- C62 ROCK  |
|     |        |      |      | ( 12.87%) (206)ring tXY C94- C86 ROCK  |
|     |        |      |      | ( 7.01%) (257)torsion C66- C65 TORS    |
| 230 | 366.10 | 1.31 | 0.00 | ( 9.12%) (184)tert XY3 , X= C78 ADEFa  |
|     |        |      |      | ( 5.86%) (189)skel, C79 C81 C80 BEND   |
|     |        |      |      | ( 6.64%) (197)tert XY3 , X= C82 ADEFb  |
|     |        |      |      | ( 6.75%) (206)ring tXY C94- C86 ROCK   |
|     |        |      |      | ( 5.25%) (207)ring tXY C94- C86 WAGG   |
|     |        |      |      | ( 5.96%) (221)ring tXY2, X= C90 ROCK   |
|     |        |      |      | ( 9.44%) (223)ring tXY2, X= C90 TWIST  |
| 231 | 355.81 | 0.19 | 0.03 | ( 11.30%) (196)tert XY3 , X= C82 ADEFa |
|     |        |      |      | ( 8.56%) (204)ring tXY C84- C85 ROCK   |
|     |        |      |      | ( 11.15%) (220)ring tXY2, X= C90 SCIS  |
|     |        |      |      | ( 14.13%) (222)ring tXY2, X= C90 WAGG  |
| 232 | 347.90 | 5.52 | 0.03 | ( 5.82%) (128)ring tXY C63- C62 ROCK   |
|     |        |      |      | ( 5.86%) (169)tert XY3 , X= C73 ADEFa  |
|     |        |      |      | ( 5.55%) (256)torsion C65- C64 TORS    |
|     |        |      |      | ( 5.82%) (273)torsion C82- C81 TORS    |
| 233 | 340.91 | 0.39 | 0.23 | ( 5.52%) ( 99) 6-membered ring BEND    |
|     |        |      |      | ( 9.87%) (110)ring tXY2, X= C57 SCIS   |
|     |        |      |      | ( 8.94%) (113)ring tXY2, X= C57 TWIST  |
|     |        |      |      | ( 9.27%) (273)torsion C82- C81 TORS    |
| 234 | 332.04 | 0.74 | 0.42 | ( 12.59%) (110)ring tXY2, X= C57 SCIS  |
|     |        |      |      | ( 5.75%) (113)ring tXY2, X= C57 TWIST  |
|     |        |      |      | ( 5.75%) (256)torsion C65- C64 TORS    |
|     |        |      |      | ( 10.86%) (257)torsion C66- C65 TORS   |
| 235 | 315.73 | 0.08 | 0.15 | ( 18.63%) (110)ring tXY2, X= C57 SCIS  |
|     |        |      |      | ( 13.84%) (113)ring tXY2, X= C57 TWIST |
|     |        |      |      | ( 20.11%) (220)ring tXY2, X= C90 SCIS  |
| 236 | 314.73 | 0.20 | 0.07 | ( 10.30%) (110)ring tXY2, X= C57 SCIS  |
|     |        |      |      | ( 16.50%) (113)ring tXY2, X= C57 TWIST |

|     |        |      |      |                                                                                                                                                                                                                                                                                                                           |
|-----|--------|------|------|---------------------------------------------------------------------------------------------------------------------------------------------------------------------------------------------------------------------------------------------------------------------------------------------------------------------------|
|     |        |      |      | ( 22.59%) (220)ring tXY2, X= C90 SCIS                                                                                                                                                                                                                                                                                     |
| 237 | 308.18 | 0.47 | 0.67 | ( 6.13%) (110)ring tXY2, X= C57 SCIS<br>( 5.01%) (112)ring tXY2, X= C57 WAGG<br>( 5.50%) (129)ring tXY C63- C62 WAGG<br>( 7.67%) (130)skel, C62 C64 C63 BEND<br>( 5.32%) (165)skel, C67 C73 C72 BEND<br>( 9.34%) (169)tert XY3 , X= C73 ADEFa                                                                             |
| 238 | 292.17 | 0.57 | 0.95 | ( 5.38%) (204)ring tXY C84- C85 ROCK<br>( 5.57%) (205)ring tXY C84- C85 WAGG<br>( 5.37%) (220)ring tXY2, X= C90 SCIS<br>( 7.95%) (223)ring tXY2, X= C90 TWIST<br>( 6.84%) (264)torsion C73- C72 TORS<br>( 5.27%) (265)torsion C74- C73 TORS<br>( 5.34%) (274)torsion C83- C82 TORS<br>( 5.17%) (281)torsion C95- C90 TORS |
| 239 | 287.49 | 0.10 | 0.30 | ( 11.95%) (264)torsion C73- C72 TORS<br>( 8.52%) (265)torsion C74- C73 TORS<br>( 8.70%) (269)torsion C78- C77 TORS<br>( 15.96%) (270)torsion C79- C78 TORS<br>( 7.44%) (273)torsion C82- C81 TORS<br>( 5.24%) (274)torsion C83- C82 TORS                                                                                  |
| 240 | 272.97 | 0.55 | 0.01 | ( 66.02%) (282)torsion C96- C90 TORS                                                                                                                                                                                                                                                                                      |
| 241 | 271.34 | 0.80 | 0.00 | ( 7.71%) (137)tert XY3 , X= C65 ADEFa<br>( 9.21%) (139)skel, C65 C67 C66 BEND<br>( 6.21%) (170)tert XY3 , X= C73 ADEFb<br>( 10.23%) (192)skel, C80 C82 C81 BEND<br><br>( 5.60%) (196)tert XY3 , X= C82 ADEFa<br>( 5.58%) (197)tert XY3 , X= C82 ADEFb<br>( 10.36%) (282)torsion C96- C90 TORS                             |
| 242 | 268.21 | 0.16 | 0.04 | ( 61.98%) (260)torsion C69- C57 TORS<br>( 19.37%) (261)torsion C70- C57 TORS                                                                                                                                                                                                                                              |
| 243 | 259.45 | 0.39 | 0.02 | ( 6.10%) (101) 6-membered ring TORS<br>( 30.03%) (103) 6-membered ring TORS<br><br>( 7.23%) (111)ring tXY2, X= C57 ROCK<br>( 12.85%) (260)torsion C69- C57 TORS                                                                                                                                                           |
| 244 | 257.87 | 0.46 | 0.07 | ( 5.32%) (103) 6-membered ring TORS<br>( 19.98%) (107) 6-membered ring TORS<br>( 21.28%) (109) 6-membered ring TORS<br>( 11.60%) (223)ring tXY2, X= C90 TWIST<br>( 7.47%) (280)torsion C94- C86 TORS<br>( 7.56%) (281)torsion C95- C90 TORS                                                                               |
| 245 | 249.05 | 0.20 | 0.01 | ( 14.56%) (109) 6-membered ring TORS<br>( 7.03%) (221)ring tXY2, X= C90 ROCK<br>( 15.04%) (280)torsion C94- C86 TORS<br>( 16.69%) (281)torsion C95- C90 TORS                                                                                                                                                              |
| 246 | 238.64 | 0.56 | 0.93 | ( 7.88%) (171)skel, C73 C75 C74 BEND<br>( 7.16%) (180)skel, C76 C78 C77 BEND<br>( 16.13%) (280)torsion C94- C86 TORS<br>( 6.85%) (281)torsion C95- C90 TORS                                                                                                                                                               |
| 247 | 236.75 | 2.17 | 0.37 | ( 5.44%) (101) 6-membered ring TORS                                                                                                                                                                                                                                                                                       |



|     |        |      |      |           |                        |          |      |
|-----|--------|------|------|-----------|------------------------|----------|------|
|     |        |      |      | ( 6.26%)  | (254)torsion           | C63- C62 | TORS |
|     |        |      |      | ( 8.83%)  | (259)torsion           | C68- C61 | TORS |
|     |        |      |      | ( 7.31%)  | (264)torsion           | C73- C72 | TORS |
| 248 | 228.68 | 2.21 | 0.01 | ( 18.87%) | (261)torsion           | C70- C57 | TORS |
|     |        |      |      | ( 5.57%)  | (266)torsion           | C75- C74 | TORS |
|     |        |      |      | ( 5.66%)  | (268)torsion           | C77- C76 | TORS |
|     |        |      |      | ( 17.47%) | (281)torsion           | C95- C90 | TORS |
| 249 | 224.86 | 0.82 | 0.05 | ( 6.20%)  | (265)torsion           | C74- C73 | TORS |
|     |        |      |      | ( 19.35%) | (266)torsion           | C75- C74 | TORS |
|     |        |      |      | ( 19.41%) | (268)torsion           | C77- C76 | TORS |
|     |        |      |      | ( 8.40%)  | (269)torsion           | C78- C77 | TORS |
|     |        |      |      | ( 10.14%) | (270)torsion           | C79- C78 | TORS |
|     |        |      |      | ( 6.37%)  | (272)torsion           | C81- C80 | TORS |
|     |        |      |      | ( 7.51%)  | (280)torsion           | C94- C86 | TORS |
| 250 | 220.90 | 2.12 | 0.01 | ( 6.50%)  | (258)torsion           | C67- C66 | TORS |
|     |        |      |      | ( 5.67%)  | (259)torsion           | C68- C61 | TORS |
|     |        |      |      | ( 8.21%)  | (264)torsion           | C73- C72 | TORS |
|     |        |      |      | ( 7.49%)  | (270)torsion           | C79- C78 | TORS |
|     |        |      |      | ( 6.49%)  | (272)torsion           | C81- C80 | TORS |
| 251 | 219.76 | 0.07 | 0.20 | ( 5.87%)  | (171)skel, C73 C75 C74 | BEND     |      |
|     |        |      |      | ( 6.46%)  | (180)skel, C76 C78 C77 | BEND     |      |
|     |        |      |      | ( 7.40%)  | (260)torsion C69- C57  | TORS     |      |
|     |        |      |      | ( 32.46%) | (261)torsion C70- C57  | TORS     |      |
|     |        |      |      | ( 17.21%) | (281)torsion C95- C90  | TORS     |      |
| 252 | 207.91 | 0.23 | 0.00 | ( 5.20%)  | (196)tert XY3 , X= C82 | ADEFa    |      |
|     |        |      |      | ( 8.38%)  | (198)skel, C82 C84 C83 | BEND     |      |
|     |        |      |      | ( 5.61%)  | (259)torsion C68- C61  | TORS     |      |
|     |        |      |      | ( 16.79%) | (280)torsion C94- C86  | TORS     |      |
| 253 | 196.62 | 0.30 | 0.00 | ( 5.61%)  | (205)ring tXY C84- C85 | WAGG     |      |
|     |        |      |      | ( 5.92%)  | (261)torsion C70- C57  | TORS     |      |
| 254 | 183.41 | 0.04 | 0.28 | ( 12.52%) | (259)torsion C68- C61  | TORS     |      |
|     |        |      |      | ( 10.66%) | (274)torsion C83- C82  | TORS     |      |
|     |        |      |      | ( 11.09%) | (280)torsion C94- C86  | TORS     |      |
| 255 | 173.86 | 0.81 | 0.57 | ( 11.23%) | (129)ring tXY C63- C62 | WAGG     |      |
|     |        |      |      | ( 5.36%)  | (138)tert XY3 , X= C65 | ADEFb    |      |
|     |        |      |      | ( 5.40%)  | (171)skel, C73 C75 C74 | BEND     |      |
|     |        |      |      | ( 5.35%)  | (180)skel, C76 C78 C77 | BEND     |      |
| 256 | 172.76 | 4.23 | 0.14 | ( 5.61%)  | (133)skel, C63 C65 C64 | BEND     |      |
|     |        |      |      | ( 6.00%)  | (205)ring tXY C84- C85 | WAGG     |      |
| 257 | 162.16 | 0.39 | 1.23 | ( 8.92%)  | (256)torsion C65- C64  | TORS     |      |
|     |        |      |      | ( 22.66%) | (259)torsion C68- C61  | TORS     |      |
|     |        |      |      | ( 5.59%)  | (274)torsion C83- C82  | TORS     |      |
|     |        |      |      | ( 11.39%) | (279)torsion C93- C82  | TORS     |      |
| 258 | 152.32 | 0.05 | 0.10 | ( 5.08%)  | (256)torsion C65- C64  | TORS     |      |
|     |        |      |      | ( 5.55%)  | (259)torsion C68- C61  | TORS     |      |
|     |        |      |      | ( 31.63%) | (262)torsion C71- C65  | TORS     |      |
|     |        |      |      | ( 5.19%)  | (277)torsion C91- C73  | TORS     |      |
|     |        |      |      | ( 5.43%)  | (278)torsion C92- C78  | TORS     |      |
|     |        |      |      | ( 30.62%) | (279)torsion C93- C82  | TORS     |      |
| 259 | 145.15 | 0.31 | 0.21 | ( 36.29%) | (262)torsion C71- C65  | TORS     |      |

|     |        |      |      |                                 |          |      |
|-----|--------|------|------|---------------------------------|----------|------|
|     |        |      |      | ( 39.15%) (279)torsion          | C93- C82 | TORS |
| 260 | 138.25 | 0.03 | 0.03 | ( 19.26%) (262)torsion          | C71- C65 | TORS |
|     |        |      |      | ( 15.38%) (277)torsion          | C91- C73 | TORS |
|     |        |      |      | ( 33.43%) (278)torsion          | C92- C78 | TORS |
|     |        |      |      | ( 8.00%) (279)torsion           | C93- C82 | TORS |
| 261 | 136.26 | 0.55 | 0.01 | ( 58.25%) (277)torsion          | C91- C73 | TORS |
|     |        |      |      | ( 35.55%) (278)torsion          | C92- C78 | TORS |
| 262 | 133.29 | 0.29 | 0.10 | ( 56.29%) (108) 6-membered ring | TORS     |      |
|     |        |      |      | ( 10.22%) (109) 6-membered ring | TORS     |      |
|     |        |      |      | ( 9.09%) (278)torsion           | C92- C78 | TORS |
| 263 | 121.31 | 0.03 | 0.04 | ( 26.10%) (101) 6-membered ring | TORS     |      |
|     |        |      |      | ( 9.36%) (103) 6-membered ring  | TORS     |      |
|     |        |      |      | ( 6.29%) (127)ring tXY          | C68- C61 | WAGG |
|     |        |      |      | ( 9.34%) (259)torsion           | C68- C61 | TORS |
| 264 | 115.07 | 0.02 | 0.02 | ( 15.85%) (101) 6-membered ring | TORS     |      |
|     |        |      |      | ( 9.33%) (108) 6-membered ring  | TORS     |      |
|     |        |      |      | ( 5.76%) (272)torsion           | C81- C80 | TORS |
|     |        |      |      | ( 5.68%) (277)torsion           | C91- C73 | TORS |
|     |        |      |      | ( 5.94%) (278)torsion           | C92- C78 | TORS |
| 265 | 112.70 | 0.26 | 0.03 | ( 13.37%) (101) 6-membered ring | TORS     |      |
| 266 | 109.46 | 0.10 | 0.14 | ( 9.60%) (101) 6-membered ring  | TORS     |      |
|     |        |      |      | ( 12.03%) (102) 6-membered ring | TORS     |      |
| 267 | 90.33  | 0.08 | 0.12 | ( 6.15%) (130)skel, C62 C64 C63 | BEND     |      |
|     |        |      |      | ( 7.26%) (165)skel, C67 C73 C72 | BEND     |      |
| 268 | 89.02  | 0.08 | 0.06 | ( 8.94%) (102) 6-membered ring  | TORS     |      |
|     |        |      |      | ( 6.43%) (204)ring tXY          | C84- C85 | ROCK |
|     |        |      |      | ( 5.49%) (255)torsion           | C64- C63 | TORS |
|     |        |      |      | ( 6.71%) (275)torsion           | C84- C83 | TORS |
| 269 | 82.24  | 0.03 | 0.30 | ( 5.83%) (128)ring tXY          | C63- C62 | ROCK |
|     |        |      |      | ( 5.43%) (204)ring tXY          | C84- C85 | ROCK |
| 270 | 76.89  | 0.02 | 0.74 | ( 15.67%) (258)torsion          | C67- C66 | TORS |
|     |        |      |      | ( 7.18%) (264)torsion           | C73- C72 | TORS |
|     |        |      |      | ( 6.26%) (266)torsion           | C75- C74 | TORS |
|     |        |      |      | ( 6.58%) (268)torsion           | C77- C76 | TORS |
|     |        |      |      | ( 5.64%) (270)torsion           | C79- C78 | TORS |
|     |        |      |      | ( 14.82%) (272)torsion          | C81- C80 | TORS |
|     |        |      |      | ( 5.04%) (276)torsion           | C85- C84 | TORS |
| 271 | 66.69  | 0.04 | 0.00 | ( 19.61%) (102) 6-membered ring | TORS     |      |
|     |        |      |      | ( 11.50%) (107) 6-membered ring | TORS     |      |
| 272 | 62.75  | 0.63 | 0.35 | ( 5.15%) (265)torsion           | C74- C73 | TORS |
|     |        |      |      | ( 12.19%) (266)torsion          | C75- C74 | TORS |
|     |        |      |      | ( 12.29%) (268)torsion          | C77- C76 | TORS |
|     |        |      |      | ( 5.78%) (269)torsion           | C78- C77 | TORS |
|     |        |      |      | ( 5.44%) (275)torsion           | C84- C83 | TORS |
| 273 | 52.41  | 0.11 | 0.04 | ( 24.14%) (102) 6-membered ring | TORS     |      |
|     |        |      |      | ( 5.04%) (103) 6-membered ring  | TORS     |      |
|     |        |      |      | ( 15.12%) (107) 6-membered ring | TORS     |      |
| 274 | 46.97  | 0.12 | 0.12 | ( 12.49%) (107) 6-membered ring | TORS     |      |

|     |       |      |      |                                       |
|-----|-------|------|------|---------------------------------------|
|     |       |      |      | ( 11.68%) (254)torsion C63- C62 TORS  |
|     |       |      |      | ( 5.10%) (270)torsion C79- C78 TORS   |
|     |       |      |      | ( 12.12%) (276)torsion C85- C84 TORS  |
| 275 | 42.09 | 0.11 | 0.02 | ( 7.99%) (102) 6-membered ring TORS   |
|     |       |      |      | ( 8.08%) (107) 6-membered ring TORS   |
|     |       |      |      | ( 10.58%) (130)skel, C62 C64 C63 BEND |
|     |       |      |      | ( 5.59%) (133)skel, C63 C65 C64 BEND  |
|     |       |      |      | ( 5.36%) (198)skel, C82 C84 C83 BEND  |
|     |       |      |      | ( 10.63%) (201)skel, C83 C85 C84 BEND |
| 276 | 37.65 | 0.03 | 0.03 | ( 6.55%) (107) 6-membered ring TORS   |
|     |       |      |      | ( 5.26%) (257)torsion C66- C65 TORS   |
|     |       |      |      | ( 7.24%) (264)torsion C73- C72 TORS   |
|     |       |      |      | ( 9.67%) (270)torsion C79- C78 TORS   |
|     |       |      |      | ( 10.79%) (273)torsion C82- C81 TORS  |
|     |       |      |      | ( 7.24%) (275)torsion C84- C83 TORS   |
| 277 | 28.59 | 0.00 | 0.19 | ( 5.95%) (254)torsion C63- C62 TORS   |
|     |       |      |      | ( 7.27%) (256)torsion C65- C64 TORS   |
|     |       |      |      | ( 8.37%) (257)torsion C66- C65 TORS   |
|     |       |      |      | ( 6.32%) (266)torsion C75- C74 TORS   |
|     |       |      |      | ( 6.07%) (268)torsion C77- C76 TORS   |
|     |       |      |      | ( 5.04%) (273)torsion C82- C81 TORS   |
|     |       |      |      | ( 6.16%) (274)torsion C83- C82 TORS   |
|     |       |      |      | ( 7.56%) (276)torsion C85- C84 TORS   |
| 278 | 22.82 | 0.00 | 0.51 | ( 7.43%) (130)skel, C62 C64 C63 BEND  |
|     |       |      |      | ( 5.19%) (139)skel, C65 C67 C66 BEND  |
|     |       |      |      | ( 8.49%) (142)skel, C66 C72 C67 BEND  |
|     |       |      |      | ( 5.29%) (186)skel, C78 C80 C79 BEND  |
|     |       |      |      | ( 10.16%) (189)skel, C79 C81 C80 BEND |
|     |       |      |      | ( 5.95%) (192)skel, C80 C82 C81 BEND  |
|     |       |      |      | ( 7.43%) (201)skel, C83 C85 C84 BEND  |
| 279 | 15.90 | 0.01 | 0.30 | ( 23.43%) (254)torsion C63- C62 TORS  |
|     |       |      |      | ( 13.37%) (256)torsion C65- C64 TORS  |
|     |       |      |      | ( 13.47%) (258)torsion C67- C66 TORS  |
|     |       |      |      | ( 8.75%) (264)torsion C73- C72 TORS   |
|     |       |      |      | ( 5.48%) (266)torsion C75- C74 TORS   |
|     |       |      |      | ( 6.48%) (269)torsion C78- C77 TORS   |
| 280 | 15.25 | 0.01 | 0.32 | ( 7.64%) (270)torsion C79- C78 TORS   |
|     |       |      |      | ( 11.83%) (272)torsion C81- C80 TORS  |
|     |       |      |      | ( 14.31%) (274)torsion C83- C82 TORS  |
|     |       |      |      | ( 33.71%) (276)torsion C85- C84 TORS  |
| 281 | 10.74 | 0.10 | 0.02 | ( 6.84%) (142)skel, C66 C72 C67 BEND  |
|     |       |      |      | ( 6.79%) (165)skel, C67 C73 C72 BEND  |
|     |       |      |      | ( 8.36%) (171)skel, C73 C75 C74 BEND  |
|     |       |      |      | ( 12.38%) (174)skel, C74 C76 C75 BEND |
|     |       |      |      | ( 12.20%) (177)skel, C75 C77 C76 BEND |
|     |       |      |      | ( 7.99%) (180)skel, C76 C78 C77 BEND  |
|     |       |      |      | ( 5.92%) (186)skel, C78 C80 C79 BEND  |
|     |       |      |      | ( 5.91%) (189)skel, C79 C81 C80 BEND  |
| 282 | 7.92  | 0.02 | 0.03 | ( 5.36%) (173)secd XY, C74- H31 OUT   |
|     |       |      |      | ( 5.23%) (176)secd XY, C75- H32 OUT   |
|     |       |      |      | ( 5.02%) (179)secd XY, C76- H33 OUT   |
|     |       |      |      | ( 8.16%) (265)torsion C74- C73 TORS   |
|     |       |      |      | ( 7.63%) (267)torsion C76- C75 TORS   |
|     |       |      |      | ( 7.25%) (269)torsion C78- C77 TORS   |

**Table S2.** Calculated electronic transitions and oscillator strengths of carotene

| Gaussian (C <sub>2H</sub> )<br>Wavelength, nm (energy, eV) | Gaussian (C <sub>2H</sub> )<br>oscillator strength | character                                                  | Turbomole (C <sub>1</sub> )<br>Wavelength, nm (energy, eV) | Turbomole (C <sub>1</sub> )<br>oscillator strength | character                                                                            |
|------------------------------------------------------------|----------------------------------------------------|------------------------------------------------------------|------------------------------------------------------------|----------------------------------------------------|--------------------------------------------------------------------------------------|
| 618.6 (2.0)                                                | 4.0193 (B <sub>U</sub> )                           | H → L (68)                                                 | 556.26 (2.23)                                              | 3.8342 (BU)                                        | H → L (97.9)                                                                         |
| 523.46 (2.37)                                              | 0 (A <sub>G</sub> )                                | H-1 → L (63), H → L+1 (37)                                 | 468.65 (2.65)                                              | 0.0001                                             | H-1 → L (68.6), H → L+1 (29.7)                                                       |
| 403.75 (3.07)                                              | 0.0984 (B <sub>U</sub> )                           | H-2 → L (72), H → L+2 (24)                                 | 378.01 (3.28)                                              | 0.1388                                             | H-2 → L (82.4), H → L+2 (13.5)                                                       |
| 390.2 (3.18)                                               | 0 (A <sub>G</sub> )                                | H → L+1 (45), H-1 → L (19)<br>H-3 → L (6)                  | 372.08 (3.33)                                              | 0.0033                                             | H → L+1 (57.3), H-1 → L (25.1)<br>H-3 → L (15.5)                                     |
| 364.02 (3.41)                                              | 0.1001 (B <sub>U</sub> )                           | H-1 → L+1 (62), H → L+2<br>(34)                            | 334.85 (3.7)                                               | 0.1696                                             | H-1 → L+1 (66.5), H → L+2 (31.3)                                                     |
| 333.44 (3.72)                                              | 0 (A <sub>G</sub> )                                | H-3 → L (76), H → L+3 (14)                                 | 324.5 (3.82)                                               | 0.0002                                             | H-3 → L (77.2), H → L+1 (10.4)<br>H → L+3 (6.2)                                      |
| 311.69 (3.98)                                              | 0.281 (B <sub>U</sub> )                            | H-4 → L (32), H → L+2 (21)<br>H-1 → L+1 (16), H-2 → L (10) | 316.14 (3.92)                                              | 0.0879                                             | H-4 → L (54.8), H → L+2 (22.3)<br>H-1 → L+1 (13.1)                                   |
| 307.68 (4.03)                                              | 0 (A <sub>G</sub> )                                | H-2 → L+1 (73), H-1 → L+2<br>(16)<br>H → L+3 (9)           | 292.33 (4.24)                                              | 0.0010                                             | H-2 → L+1 (83.5), H → L+3 (7.2)                                                      |
| 293.52 (4.22)                                              | 0 (A <sub>G</sub> )                                | H-1 → L+2 (57), H → L+3<br>(37)                            | 280.47 (4.42)                                              | 0.2698                                             | H-4 → L (37.9), H → L+2 (28.8)<br>H-1 → L+1 (13.9), H → L+4 (5.6)<br>H-3 → L+1 (5.1) |
| 289.78 (4.28)                                              | 0.1857 (B <sub>U</sub> )                           | H-4 → L (54), H → L+2 (10)<br>H-1 → L+1 (6), H → L+4 (9)   | 274.65 (4.53)                                              | 0.0054                                             | H-1 → L+2 (65.2), H-5 → L (27.4)                                                     |

**Table S3.** Bond lengths (in Å) and angles (in degree) of the calculated unconstrained geometries in the  $S_0$  and  $S_2$  state.

| bond length | ground state ( $S_0$ ) | excited state ( $S_2$ ) | angle       | ground state ( $S_0$ ) | excited state ( $S_2$ ) |
|-------------|------------------------|-------------------------|-------------|------------------------|-------------------------|
| C2-C1       | 1.553                  | 1.553                   |             |                        |                         |
| C3-C2       | 1.532                  | 1.531                   | C3-C2-C1    | 112.787                | 112.912                 |
| C4-C3       | 1.535                  | 1.534                   | C4-C3-C2    | 109.792                | 109.590                 |
| C5-C4       | 1.522                  | 1.520                   | C5-C4-C3    | 114.117                | 114.218                 |
| C6-C5       | 1.363                  | 1.372                   | C6-C5-C4    | 122.789                | 122.814                 |
| C7-C6       | 1.477                  | 1.462                   | C7-C6-C5    | 123.329                | 123.996                 |
| C8-C7       | 1.358                  | 1.374                   | C8-C7-C6    | 126.396                | 127.871                 |
| C9-C8       | 1.457                  | 1.439                   | C9-C8-C7    | 126.564                | 126.135                 |
| C10-C9      | 1.373                  | 1.394                   | C10-C9-C8   | 118.226                | 118.334                 |
| C11-C10     | 1.436                  | 1.415                   | C11-C10-C9  | 128.379                | 128.510                 |
| C12-C5      | 1.515                  | 1.514                   | C12-C5-C4   | 112.992                | 113.148                 |
| C13-C1      | 1.552                  | 1.553                   | C13-C1-C2   | 107.460                | 107.059                 |
| C14-C1      | 1.555                  | 1.555                   | C14-C1-C13  | 108.555                | 108.727                 |
| C15-C9      | 1.512                  | 1.512                   | C15-C9-C8   | 118.485                | 119.099                 |
| C16-C11     | 1.369                  | 1.393                   | C16-C11-C10 | 122.732                | 122.891                 |
| C17-C16     | 1.445                  | 1.419                   | C17-C16-C11 | 126.883                | 126.815                 |
| C18-C17     | 1.379                  | 1.407                   | C18-C17-C16 | 118.316                | 118.547                 |
| C19-C18     | 1.430                  | 1.404                   | C19-C18-C17 | 128.317                | 128.370                 |
| C20-C19     | 1.373                  | 1.402                   | C20-C19-C18 | 123.477                | 123.754                 |
| C21-C20     | 1.430                  | 1.403                   | C21-C20-C19 | 123.647                | 123.707                 |
| C22-C21     | 1.379                  | 1.408                   | C22-C21-C20 | 128.197                | 128.420                 |
| C23-C22     | 1.445                  | 1.419                   | C23-C22-C21 | 118.401                | 118.506                 |
| C24-C23     | 1.369                  | 1.393                   | C24-C23-C22 | 126.750                | 126.863                 |
| C25-C24     | 1.436                  | 1.414                   | C25-C24-C23 | 122.894                | 122.841                 |
| C26-C25     | 1.373                  | 1.395                   | C26-C25-C24 | 128.242                | 128.549                 |
| C27-C26     | 1.457                  | 1.437                   | C27-C26-C25 | 118.327                | 118.307                 |
| C28-C27     | 1.359                  | 1.375                   | C28-C27-C26 | 126.400                | 126.116                 |
| C29-C28     | 1.477                  | 1.461                   | C29-C28-C27 | 125.751                | 127.194                 |
| C30-C29     | 1.363                  | 1.373                   | C30-C29-C28 | 122.712                | 123.588                 |
| C31-C30     | 1.520                  | 1.518                   | C31-C30-C29 | 122.917                | 122.973                 |
| C32-C31     | 1.533                  | 1.532                   | C32-C31-C30 | 113.711                | 113.817                 |
| C33-C32     | 1.532                  | 1.531                   | C33-C32-C31 | 109.307                | 108.888                 |
| C34-C33     | 1.553                  | 1.554                   | C34-C33-C32 | 112.657                | 112.659                 |
| C35-C17     | 1.514                  | 1.514                   | C35-C17-C16 | 118.556                | 119.287                 |
| C36-C22     | 1.514                  | 1.514                   | C36-C22-C21 | 123.090                | 122.167                 |
| C37-C26     | 1.512                  | 1.512                   | C37-C26-C25 | 123.247                | 122.532                 |
| C38-C30     | 1.515                  | 1.513                   | C38-C30-C29 | 124.392                | 124.397                 |
| C39-C34     | 1.554                  | 1.554                   | C39-C34-C33 | 109.911                | 109.750                 |
| C40-C34     | 1.554                  | 1.555                   | C40-C34-C33 | 107.257                | 106.856                 |
